1 **GtcA is required for LTA glycosylation in *Listeria monocytogenes* serovar 1/2a and**  
2 ***Bacillus subtilis***

3  
4 **Jeanine Rismondo<sup>1</sup>, Talal F. M. Haddad<sup>1</sup>, Yang Shen<sup>2</sup>, Martin J. Loessner<sup>2</sup>, Angelika**  
5 **Gründling<sup>1#</sup>**

6 <sup>1</sup> Section of Molecular Microbiology and Medical Research Council Centre for Molecular  
7 Bacteriology and Infection, Imperial College London, London SW7 2AZ.

8 <sup>2</sup> Institute of Food, Nutrition and Health, ETH Zurich, 8092 Zurich, Switzerland.

9  
10 #To whom correspondence should be addressed: Angelika Gründling –  
11 a.grundling@imperial.ac.uk

12  
13  
14  
15 Keywords: Gram-positive bacteria, cell wall, lipoteichoic acid, wall teichoic acid,  
16 glycosylation, bactoprenol

17  
18  
19

20 **ABSTRACT**

21 The cell wall polymers wall teichoic acid (WTA) and lipoteichoic acid (LTA) are often  
22 modified with glycosyl and D-alanine residues. Recent studies have shown that a three-  
23 component glycosylation system is used for the modification of LTA in several Gram-positive  
24 bacteria including *Bacillus subtilis* and *Listeria monocytogenes*. In the *L. monocytogenes* 1/2a  
25 strain 10403S, the cytoplasmic glycosyltransferase GtIA is thought to use UDP-galactose to  
26 produce the C<sub>55</sub>-P-galactose lipid intermediate, which is transported across the membrane by  
27 an unknown flippase. Next, the galactose residue is transferred onto the LTA backbone on the  
28 outside of the cell by the glycosyltransferase GtIB. Here we show that GtcA is necessary for  
29 the glycosylation of LTA in *L. monocytogenes* 10403S and *B. subtilis* 168 and we hypothesize  
30 that these proteins act as C<sub>55</sub>-P-sugar flippases. With this we revealed that GtcA is involved in  
31 the glycosylation of both teichoic acid polymers in *L. monocytogenes* 10403S, namely WTA  
32 with N-acetylglucosamine and LTA with galactose residues. These findings indicate that the  
33 *L. monocytogenes* GtcA protein can act on different C<sub>55</sub>-P-sugar intermediates. Further  
34 characterization of GtcA in *L. monocytogenes* led to the identification of residues essential for  
35 its overall function as well as residues, which predominately impact WTA or LTA  
36 glycosylation.

37

38 **GRAPHICAL ABSTRACT**

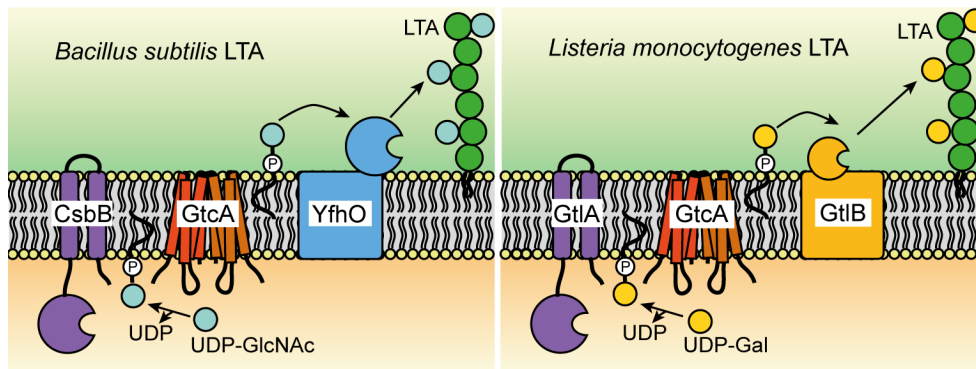

39

40

41

## 42 1. INTRODUCTION

43 Bactoprenol, also referred to as undecaprenyl phosphate (C<sub>55</sub>-P), is used for a wide range of  
44 processes in bacteria including the biosynthesis of peptidoglycan, lipopolysaccharides (LPS)  
45 and teichoic acids (Harkness and Braun, 1989, Kennedy, 1987, Weissborn et al., 1991, Soldo  
46 et al., 2002). This molecule is an essential lipid-carrier to which sugars, monomeric subunits  
47 of cell wall components or complete polymers are linked in the cytoplasm of the cell. The lipid-  
48 linked intermediates are subsequently moved across the membrane by flippase enzymes or  
49 transporters and finally incorporated on the outside of the cell in diverse cell wall structures.  
50 However, the mechanism by which the different lipid-linked intermediates are flipped or  
51 transported across the membrane as well as the proteins involved in such processes are not well  
52 characterized.

53 Teichoic acids are important cell wall polymers produced by Gram-positive bacteria.  
54 They are either covalently linked to the peptidoglycan and referred to as wall teichoic acid  
55 (WTA) or embedded in the cytoplasm via a glycolipid anchor and called lipoteichoic acid  
56 (LTA) (Araki and Ito, 1989, Neuhaus and Baddiley, 2003, Percy and Gründling, 2014). These  
57 cell wall polymers are essential for the maintenance of the cell integrity and play an important  
58 role in antimicrobial resistance, cation homeostasis, regulation of peptidoglycan autolysins,  
59 cell division and virulence and the simultaneous absence of both, LTA and WTA, has been  
60 shown to be lethal in *Staphylococcus aureus* and *Bacillus subtilis* (Brown et al., 2012, Spears  
61 et al., 2016, Schirner et al., 2009, Percy and Gründling, 2014, Brown et al., 2013). The  
62 bactoprenol lipid carrier molecular C<sub>55</sub>-P is required at multiple steps during the synthesis and  
63 modification process of teichoic acids in Gram-positive bacteria.

64 In *B. subtilis*, the synthesis of WTA begins in the cytoplasm of the cell with the  
65 glycosyltransferase (GT) TagO, which transfers N-acetyl glucosamine (GlcNAc) phosphate  
66 from UDP-GlcNAc onto undecaprenyl phosphate (Soldo et al., 2002). Next, N-  
67 acetylmannosamine (ManNAc) is attached onto C<sub>55</sub>-PP-GlcNAc by TagA, followed by the  
68 transfer of glycerol phosphate (GroP) units by TagB and TagF (Bhavsar et al., 2005, Ginsberg  
69 et al., 2006, Schertzer and Brown, 2003, Pereira et al., 2008). Following the synthesis of the  
70 WTA polymer, the GroP backbone is further modified with glucose residues on the inside of  
71 the cell by the cytoplasmic glycosyltransferase (GT) TagE. The synthesized and glycosylated  
72 WTA polymer is subsequently transported across the membrane by the ABC-transporter  
73 TagGH (Lazarevic and Karamata, 1995). After the export, WTA is modified with D-Alanine  
74 residues by enzymes encoded in the *dlt* operon and linked to the peptidoglycan layer by Lcp  
75 enzymes (Kawai et al., 2011, Perego et al., 1995). Other Gram-positive bacteria, including

76 most *S. aureus* strains, *Listeria monocytogenes* strains, and *B. subtilis* strain W23 produce  
77 WTA with a ribitolphosphate (RboP) backbone (Brown et al., 2010, Weidenmaier and Peschel,  
78 2008, Uchikawa et al., 1986). The enzymes involved in this process are encoded by the *tar/tag*  
79 genes (Weidenmaier and Peschel, 2008, Brown et al., 2010). WTA of *S. aureus* is also modified  
80 on the inside of the cell with GlcNAc residues by the cytoplasmic glycosyltransferases (GTs)  
81 TarM, TarS and TarP before it is exported and attached to the peptidoglycan layer (Allison et  
82 al., 2011, Gerlach et al., 2018, Xia et al., 2010, Brown et al., 2012, Dengler et al., 2012).  
83 Recently, a different mechanism has been proposed for the glycosylation of WTA with GlcNAc  
84 residues in *L. monocytogenes* serovar 1/2a strains (Rismondo et al., 2018). In this case, the  
85 cytoplasmic GT Lmo2550 utilizes UDP-GlcNAc to form C<sub>55</sub>-P-GlcNAc, a lipid linked sugar  
86 intermediate, which is flipped across the membrane by the putative flippase GtcA (Lmo2549)  
87 (Eugster et al., 2011, Promadej et al., 1999, Cheng et al., 2008). In the next step, the  
88 glycosyltransferase YfhO (Lmo1079) is thought to transfer the GlcNAc residue from the C<sub>55</sub>-  
89 P-GlcNAc intermediate onto the WTA backbone on the outside of the cell (Eugster et al., 2015,  
90 Rismondo et al., 2018)(Fig. 1A).

91 A similar three enzyme glycosylation process has been suggested for the glycosylation  
92 of the LTA polymer, which is synthesized on a glycolipid anchor on the outside of the cell and  
93 hence can only be glycosylated extracellularly (Iwasaki et al., 1989, Fischer, 1994, Mancuso  
94 and Chiu, 1982, Yokoyama et al., 1988) (Fig. 1B and 1C). The synthesis of LTA starts in the  
95 cytoplasm with the transfer of two glucose molecules from UDP-glucose to diacylglycerol  
96 (DAG) by UgtP and YpfP in *B. subtilis* and *S. aureus*, respectively (Jorasch et al., 1998,  
97 Kiriukhin et al., 2001). In *L. monocytogenes*, the glycolipid anchor is produced by LafA and  
98 LafB, which transfer a glucose and subsequently a galactose molecule onto DAG (Webb et al.,  
99 2009). The glycolipids are subsequently transported across the membrane and this step is in *S.*  
100 *aureus* likely mediated by the membrane protein LtaA (Kiriukhin et al., 2001, Gründling and  
101 Schneewind, 2007a). The proteins required for the flipping of the glycolipid have not yet been  
102 identified in *B. subtilis* and *L. monocytogenes*. The glycerolphosphate LTA backbone is  
103 subsequently polymerized directly on the glycolipid anchor on the outside of the cell by one or  
104 multiple lipoteichoic acid synthase (LtaS)-type enzymes (Gründling and Schneewind, 2007b,  
105 Webb et al., 2009, Wörmann et al., 2011, Schirner et al., 2009). The LTA GroP backbone is  
106 then modified with D-alanine and often additional sugar residues. Biochemical studies led to  
107 the suggestion that the LTA glycosylation process starts with the synthesis of a C<sub>55</sub>-P lipid-  
108 linked sugar intermediate by a cytoplasmic glycosyltransferase. This intermediate is  
109 subsequently flipped across the membrane by a flippase enzyme. In the last step, a

110 glycosyltransferase with extracellular activity transfers the sugar moiety onto the LTA  
111 backbone (Fischer, 1994, Iwasaki et al., 1989, Yokoyama et al., 1988, Mancuso and Chiu,  
112 1982). Consistent with this model, a three-component glycosylation system composed of the  
113 cytoplasmic glycosyltransferase CsbB, the small membrane protein and putative flippase GtcA  
114 and the LTA-specific glycosyltransferase YfhO has recently been shown to be required for the  
115 glycosylation of the LTA polymer in *S. aureus* with GlcNAc residues (Kho and Meredith,  
116 2018). In *B. subtilis*, CsbB and YfhO have been identified as likely cytoplasmic and  
117 extracellular GTs (Fig. 1C) and mutations in the genes coded for these enzymes led to the  
118 absence of glucose residues on LTA (Percy et al., 2016, Rismondo et al., 2018). Here it is  
119 interesting to note that as mentioned above the YfhO homolog of *L. monocytogenes*, Lmo1079,  
120 is responsible for the glycosylation of WTA with GlcNAc residues and not required for the  
121 LTA glycosylation process. This observation raises the question of the sugar- and acceptor-  
122 specificity of YfhO-like enzymes, a question that was addressed as part of this study. In *L.*  
123 *monocytogenes* serotype 1/2a strains, *gtlA* and *gtlB* encode the likely cytoplasmic and  
124 extracellular GTs involved in the LTA glycosylation process and deletion of these genes leads  
125 to the absence of galactose residues on LTA (Fig. 1B) (Percy et al., 2016, Rismondo et al.,  
126 2018). For a *L. monocytogenes* serotype 4b strain, it has recently been shown that *gttA*,  
127 encoding a membrane-anchored GT with a cytoplasmatically located enzymatic domain, is  
128 likely involved in the production of a C<sub>55</sub>-P-galactose intermediate, which is required for the  
129 glycosylation of LTA and WTA (Sumrall et al., 2019). However, the proteins involved in the  
130 transport of the C<sub>55</sub>-P-sugar intermediates during the LTA glycosylation have not been  
131 identified in *B. subtilis* and *L. monocytogenes*. Deletion of *gtcA* in a *L. monocytogenes* serotype  
132 4b strain has been shown to lead to the loss of sugar modifications on WTA (Promadej et al.,  
133 1999). While there is evidence in the literature that the absence of GtcA does not impact the  
134 structure of LTA in *L. monocytogenes* serovar 4b strains (Promadej et al., 1999), the recent  
135 finding that LTA and WTA are glycosylated by similar mechanisms in *L. monocytogenes*  
136 10403S, a serovar 1/2a strain (Rismondo et al., 2018) (Fig. 1A and 1B) prompted us to revisit  
137 the involvement of GtcA in the LTA glycosylation process. A GtcA homolog is also present in  
138 *B. subtilis*, but its function in the LTA glycosylation process has not been investigated. As part  
139 of this study, *gtcA* deletion and complementation strains were constructed in *B. subtilis* 168  
140 and *L. monocytogenes* 10403S and the composition of teichoic acid polymers analyzed using  
141 a combination of western-blot, fluorescence microscopy, NMR and mass-spectrometry  
142 techniques. Our results show that GtcA is required for the glycosylation of LTA in *B. subtilis*  
143 168 and for LTA and WTA glycosylation in *L. monocytogenes* 10403S, suggesting that the

144 predicted flippase can recognize and transport both C<sub>55</sub>-P-galactose and C<sub>55</sub>-P-GlcNAc  
145 intermediates in *L. monocytogenes*. Using a mutagenesis approach, we identified conserved  
146 residues that are essential for GtcA protein function, as well as residues that primarily affect  
147 LTA or WTA glycosylation in *L. monocytogenes*. To our knowledge, this is the first time that  
148 essential residues have been identified in predicted undecaprenyl carrier flippases belonging to  
149 the GtrA family of proteins (Allison and Verma, 2000) and this information will help us better  
150 understand how members of this large protein family could function as undecaprenyl carrier  
151 flippases.

152

## 153 2. MATERIALS AND METHODS

154 **2.1 Bacterial strains and growth conditions.** All strains and plasmids used in this study are  
155 listed in Table S1. *Escherichia coli* and *Bacillus subtilis* strains were grown in lysogenic broth  
156 (LB) medium and *Listeria monocytogenes* strains in brain heart infusion (BHI) medium at 37°C  
157 unless otherwise stated. If necessary, antibiotics and supplements were added to the medium  
158 at following concentrations: for *E. coli* cultures, ampicillin (Amp) at 100 µg/ml,  
159 chloramphenicol (Cam) at 20 µg/ml and kanamycin (Kan) at 30 µg/ml, for *B. subtilis* cultures,  
160 chloramphenicol (Cam) at 5 µg/ml, kanamycin (Kan) at 10 µg/ml, and for *L. monocytogenes*  
161 cultures, chloramphenicol (Cam) at 10 µg/ml, kanamycin (Kan) at 30 µg/ml, IPTG at 1 mM.

162

163 **2.2 Strain and plasmid construction.** All primers used in this study are listed in Table S2.  
164 For the generation of *L. monocytogenes* strains 10403SΔ*gtlA*Δ*gtlB* (or short 10403SΔ*gtlAB*;  
165 ANG5195) and 10403SΔ*lmo1079*Δ*lmo2550* (ANG5197), plasmids pKSV7-Δ*gtlB* (ANG4738)  
166 and pKSV7-Δ*lmo2550* (ANG2223) were transformed into 10403SΔ*gtlA* (ANG2325) and  
167 10403SΔ*lmo1079* (ANG2794), respectively, and the *gtlB* gene or *lmo2550* gene deleted by  
168 allelic exchange using a previously described method (Camilli et al., 1993). The deletion of  
169 *gtlB* and *lmo2550* was verified by PCR. For the IPTG-inducible expression of the *csbB-yfhO*  
170 operon in *L. monocytogenes*, the *csbB-yfhO* region was amplified using *B. subtilis* 168  
171 chromosomal DNA and primers ANG3143/3144. The resulting PCR product was cut with  
172 NcoI and SalI and ligated with plasmid pIMK3 that had been cut with the same enzymes.  
173 Plasmid pIMK3-*csbB-yfhO* was recovered in *E. coli* XL1-Blue yielding strain ANG5182.  
174 pIMK3-*csbB-yfhO* was subsequently transformed into *L. monocytogenes* strains  
175 10403SΔ*gtlAB* and 10403SΔ*lmo1079*Δ*lmo2550* by electroporation, resulting in the  
176 construction of strains 10403SΔ*gtlAB* pIMK3-*csbB-yfhO* (ANG5199) and  
177 10403SΔ*lmo1079*Δ*lmo2550* pIMK3-*csbB-yfhO* (ANG5203).

178 To generate markerless in-frame deletions in the *L. monocytogenes* genes *gtcA* (*lmo2549*) and  
179 *lmo0215*, approximately 1kb-DNA fragments up- and downstream of *gtcA* and *lmo0215* were  
180 amplified using primer pairs ANG2979/2980 and ANG2981/2982 (*gtcA*) and ANG3305/3306  
181 and ANG3307/3308 (*lmo0215*). The resulting PCR products were fused through a second PCR  
182 using primers ANG2979/2982 (*gtcA*) and ANG3305/3308 (*lmo0215*), cut with BamHI and  
183 KpnI and ligated with pKSV7 that had been digested with the same enzymes. Plasmids pKSV7-  
184  $\Delta$ *gtcA* and pKSV7- $\Delta$ *lmo0215* were subsequently recovered in *E. coli* XL1-Blue yielding strains  
185 ANG4911 and ANG5619, respectively. Next, the plasmids were electroporated into *L.*  
186 *monocytogenes* 10403S and the *gtcA* and *lmo0215* deleted by allelic exchange yielding strains  
187 10403S $\Delta$ *gtcA* (ANG4972) and 10403S $\Delta$ *lmo0215* (ANG5638). The deletion of genes *gtcA* and  
188 *lmo0215* was verified by PCR. For the construction of a *gtcA* complementation strain, plasmid  
189 pIMK3-*gtcA* was constructed enabling the IPTG-dependent expression of *gtcA*. For this  
190 purpose, *gtcA* was amplified using primers ANG3036/3037, the resulting PCR product  
191 digested with NcoI and SalI and ligated with pIMK3. Plasmid pIMK3-*gtcA* was recovered in  
192 *E. coli* XL1-Blue yielding strain ANG5026. Point mutations were introduced into the *gtcA*  
193 gene for the expression of GtcA variants with A65S, N69A, V73A, F74A, F91A, R95A,  
194 K121A and N132A amino acid substitutions. To this end, primer pairs ANG3036/3216 (A65S),  
195 ANG3036/3218 (N69A), ANG3036/3220 (V73A), ANG3036/3222 (F74A), ANG3036/3224  
196 (F91A), ANG3036/3226 (R95A), ANG3036/3228 (K121A) and ANG33036/3230 (N132A)  
197 were used to amplify the 5' end of *gtcA* introducing the appropriate base change(s) as part of  
198 the reverse primer sequence. The 3' end of *gtcA* was amplified using primers ANG3037/3215  
199 (A65S), ANG3037/3217 (N69A), ANG3037/3219 (V73A), ANG3037/3221 (F74A),  
200 ANG3037/3223 (F91A), ANG3037/3225 (R95A), ANG3037/3227 (K121A) and  
201 ANG3037/3229 (N132A) introducing the appropriate base change(s) as part of the forward  
202 primer. The corresponding 5' and 3' *gtcA* fragments were fused in a second PCR using primers  
203 ANG3036/3037. The resulting PCR products were digested with NcoI and SalI and ligated  
204 with pIMK3. The resulting plasmids were recovered in *E. coli* XL1-Blue yielding strains XL1-  
205 Blue pIMK3-*gtcA*<sub>A65S</sub> (ANG5620), XL1-Blue pIMK3-*gtcA*<sub>N69A</sub> (ANG5621), XL1-Blue  
206 pIMK3-*gtcA*<sub>V73A</sub> (ANG5622), XL1-Blue pIMK3-*gtcA*<sub>F74A</sub> (ANG5623), XL1-Blue pIMK3-  
207 *gtcA*<sub>F91A</sub> (ANG5624), XL1-Blue pIMK3-*gtcA*<sub>R95A</sub> (ANG5625), XL1-Blue pIMK3-*gtcA*<sub>K121A</sub>  
208 (ANG5626) and XL1-Blue pIMK3-*gtcA*<sub>N132A</sub> (ANG5627). Additionally, pIMK3-*His-gtcA* and  
209 derivatives carrying the above described point mutations were constructed allowing for the  
210 expression of N-terminally His-tagged GtcA proteins and detection by western blot. *gtcA* was  
211 amplified using primers ANG3345/3037. The resulting PCR product was used in a second PCR

212 using primers ANG3346/3037 to attach the sequence of the N-terminal His-tag. The *His-gtcA*  
213 fragment was subsequently cut with NcoI and Sall and ligated with pIMK3. Plasmid pIMK3-  
214 *His-gtcA* was recovered in *E. coli* XL1-Blue yielding strain ANG5628. For the introduction of  
215 the point mutations, primer pairs ANG3345/3216 (A65S), ANG3345/3218 (N69A),  
216 ANG3345/3220 (V73A), ANG3345/3222 (F74A), ANG3345/3224 (F91A), ANG3345/3226  
217 (R95A), ANG3345/3228 (K121A) and ANG3345/3230 (N132A) were used to amplify the 5'  
218 end of *gtcA*. The 3' end of *gtcA* was amplified using primers ANG3037/3215 (A65S),  
219 ANG3037/3217 (N69A), ANG3037/3219 (V73A), ANG3037/3221 (F74A), ANG3037/3223  
220 (F91A), ANG3037/3225 (R95A), ANG3037/3227 (K121A) and ANG3037/3229 (N132A).  
221 The appropriate fragments were fused in a second PCR using primers ANG3346/3037. The  
222 PCR products were cut with NcoI and Sall and fused with pIMK3 that had been cut with the  
223 same enzymes. The resulting plasmids were recovered in *E. coli* XL1-Blue yielding strains  
224 XL1-Blue pIMK3-*His-gtcA*<sub>A65S</sub> (ANG5629), XL1-Blue pIMK3-*His-gtcA*<sub>N69A</sub> (ANG5630),  
225 XL1-Blue pIMK3-*His-gtcA*<sub>V73A</sub> (ANG5631), XL1-Blue pIMK3-*His-gtcA*<sub>F74A</sub> (ANG5632),  
226 XL1-Blue pIMK3-*His-gtcA*<sub>F91A</sub> (ANG5633), XL1-Blue pIMK3-*His-gtcA*<sub>R95A</sub> (ANG5634),  
227 XL1-Blue pIMK3-*His-gtcA*<sub>K121A</sub> (ANG5635) and XL1-Blue pIMK3-*His-gtcA*<sub>N132A</sub>  
228 (ANG5636). The pIMK3-derivatives were introduced into *L. monocytogenes* strain  
229 10403SΔ*gtcA* by electroporation, resulting in the construction of strains 10403SΔ*gtcA* pIMK3-  
230 *gtcA* (ANG5031), 10403SΔ*gtcA* pIMK3-*gtcA*<sub>A65S</sub> (ANG5639), 10403SΔ*gtcA* pIMK3-*gtcA*<sub>N69A</sub>  
231 (ANG5640), 10403SΔ*gtcA* pIMK3-*gtcA*<sub>V73A</sub> (ANG5641), 10403SΔ*gtcA* pIMK3-*gtcA*<sub>F74A</sub>  
232 (ANG5642), 10403SΔ*gtcA* pIMK3-*gtcA*<sub>F91A</sub> (ANG5643), 10403SΔ*gtcA* pIMK3-*gtcA*<sub>R95A</sub>  
233 (ANG5644), 10403SΔ*gtcA* pIMK3-*gtcA*<sub>K121A</sub> (ANG5645), 10403SΔ*gtcA* pIMK3-*gtcA*<sub>N132A</sub>  
234 (ANG5646), 10403SΔ*gtcA* pIMK3-*His-gtcA* (ANG5647), 10403SΔ*gtcA* pIMK3-*His-gtcA*<sub>A65S</sub>  
235 (ANG5648), 10403SΔ*gtcA* pIMK3-*His-gtcA*<sub>N69A</sub> (ANG5649), 10403SΔ*gtcA* pIMK3-*His-*  
236 *gtcA*<sub>V73A</sub> (ANG5650), 10403SΔ*gtcA* pIMK3-*His-gtcA*<sub>F74A</sub> (ANG5651), 10403SΔ*gtcA* pIMK3-  
237 *His-gtcA*<sub>F91A</sub> (ANG5652), 10403SΔ*gtcA* pIMK3-*His-gtcA*<sub>R95A</sub> (ANG5653), 10403SΔ*gtcA*  
238 pIMK3-*His-gtcA*<sub>K121A</sub> (ANG5654) and 10403SΔ*gtcA* pIMK3-*His-gtcA*<sub>N132A</sub> (ANG5655).  
239 For the construction of a *B. subtilis gtcA* deletion strain, 1kb-DNA fragments up- and  
240 downstream of *gtcA* were amplified using primers ANG3068/3069 and ANG3070/3071,  
241 respectively. The resulting PCR products were cut with ApaI and XhoI, respectively and  
242 ligated with a Kan cassette, which was excised from pCN34 (ANG201) using ApaI and XhoI.  
243 The purified ligation product was transformed into *B. subtilis* 168 (wt), and transformants  
244 selected on LB agar plates containing kanamycin. The replacement of *gtcA* with the kanamycin  
245 marker was verified by PCR resulting in the construction of *B. subtilis* strains 168Δ*gtcA*::*kan*



246 (ANG5047). For the complementation of the *B. subtilis gtcA* deletion strain, plasmid  
247 pDG1662- $P_{ywcC}$ -*ywcC*-*gtcA* was constructed. To this end, *ywcC*, the first gene of the operon  
248 encoding *gtcA*, and *gtcA* were amplified together with the native  $P_{ywcC}$  promoter region using  
249 primers ANG3089/3090, the PCR product digested with BamHI and HindIII and ligated with  
250 plasmid pDG1662, that had been cut with the same enzymes. The resulting plasmid pDG1662-  
251  $P_{ywcC}$ -*ywcC*-*gtcA* was recovered in *E. coli* XL1-Blue yielding strain ANG5093. pDG1662-  
252  $P_{ywcC}$ -*ywcC*-*gtcA* was linearized using XhoI and transformed into *B. subtilis* $\Delta$ *gtcA*::*kan*  
253 yielding the *gtcA* complementation strain *B. subtilis* $\Delta$ *gtcA*::*kan amyE*:: $P_{ywcC}$ -*ywcC*-*gtcA*  
254 (ANG5102).

255

256 **2.3 GlcNAc staining with WGA.** Overnight cultures of *L. monocytogenes* strains were diluted  
257 1:100 in 5 ml BHI medium and grown for 4 h at 37°C until mid-logarithmic growth phase.  
258 Bacteria from 100  $\mu$ l culture were collected by centrifugation for 1 min at 17,000xg. The cell  
259 pellet was resuspended in 100  $\mu$ l PBS pH7.4, mixed with 50  $\mu$ l of a 0.1 mg/ml Wheat Germ  
260 Agglutinin (WGA)-Alexa Fluor<sup>®</sup> 594 conjugate lectin solution (Invitrogen) and incubated for  
261 5 min at room temperature. The cells were subsequently washed twice with PBS and suspended  
262 in 50  $\mu$ l PBS. 1-1.5  $\mu$ l of the different samples were spotted on microscope slides that were  
263 coated with a thin agarose film (1.2% agarose in distilled water), air-dried and covered with a  
264 cover lid. Phase contrast and fluorescence images were taken using a 100x objective and a  
265 Zeiss Axio Imager.A1 microscope coupled to the AxioCam MRm and processed using the Zen  
266 2012 (blue edition) software. For the detection of fluorescence signals, the Zeiss filter set 00  
267 was used.

268

269 **2.4 Preparation of cell extract and western blot analysis.** For the assessment of LTA  
270 production by western blot, *B. subtilis* 168 (wt) and derivatives thereof were grown for 16-20  
271 h in 5 ml LB medium at 30°C. Bacteria from 4 ml culture were collected by centrifugation for  
272 30 min at 17,000xg and bacterial pellets suspended to an OD<sub>600</sub> of 12 in 100  $\mu$ l 2x SDS-PAGE  
273 sample buffer. The samples were boiled for 45 min, centrifuged for 5 min and 20  $\mu$ l loaded  
274 onto 15% SDS-PAGE gels. *L. monocytogenes* 10403S (wt) and derivatives thereof were grown  
275 overnight in 5 ml BHI medium at 37°C. Where indicated, 1 mM IPTG was added to the growth  
276 to induce the expression of *gtcA* or *His-gtcA* and the different variants from the  
277 complementation plasmid pIMK3. *L. monocytogenes* cell extracts for the detection of LTA  
278 were prepared as described previously (Webb et al., 2009). LTA produced by *B. subtilis* and

279 *L. monocytogenes* strains were detected using a polyglycerolphosphate-specific antibody  
280 (Clone 55 from Hycult biotechnology) and an HRP-conjugated anti-mouse IgG (Cell Signaling  
281 Technologies, USA) at 1:4,000 and 1:10,000 dilutions, respectively. Western blots were  
282 developed by the enhanced chemiluminescence method and the signal detected using a  
283 ChemiDoc Touch Imager (Bio-Rad). All experiments were performed at least three times and  
284 representative images are shown.

285 For the detection of His-GtcA and its derivatives, bacteria from 20 ml overnight  
286 cultures were harvested by centrifugation and OD<sub>600</sub> readings taken from the same overnight  
287 cultures for normalization purposes. The cell pellets were resuspended in 1 ml ZAP buffer  
288 containing a protease inhibitor (50 mM Tris-HCl pH 7.5, 200 mM NaCl, 1 complete tablet per  
289 50 ml buffer (Roche)) and cells disrupted three times for 45 sec at 6 m/s using an MP  
290 Biomedicals™ Fastprep-24 machine. The cell suspensions were then centrifuged for 15 min at  
291 17,000xg. The resulting pellets were resuspended in 2x SDS-PAGE normalized to an OD<sub>600</sub> of  
292 40 per 100 µl sample buffer. Samples were incubated for 5 min at 37°C and 25 µl loaded on a  
293 15% Tricine SDS-PAGE gel (Schägger and von Jagow, 1987). For the detection of the His-  
294 tagged GtcA proteins, a monoclonal anti-polyHistidine-Peroxidase antibody (Sigma) was used  
295 at a 1:10,000 dilution.

296

297 **2.5 LTA and WTA isolation.** For the isolation of LTA from *B. subtilis*, the different strains  
298 were grown overnight in 2 L LB medium and cells collected by centrifugation. LTA was  
299 purified and analyzed using one dimensional (1D) <sup>1</sup>H nuclear magnetic resonance (NMR) as  
300 described previously (Gründling and Schneewind, 2007b, Rismondo et al., 2018). A modified  
301 protocol was used for the isolation of LTA from *L. monocytogenes*. Briefly, the strains were  
302 grown overnight in 1 L BHI medium that was supplemented with 1 mM IPTG when required.  
303 LTA was extracted with butanol and the extracts subsequently dialyzed against water for  
304 several days, lyophilized in D<sub>2</sub>O and analyzed by NMR. WTA was purified and analyzed by  
305 NMR as previously described (Reichmann et al., 2013, Rismondo et al., 2018).

306

307 **2.6 NMR analysis of cell wall polymers.** To analyze the LTA and WTA polymers by <sup>1</sup>H  
308 NMR, 2 mg LTA or 5 mg WTA were suspended and lyophilized twice in 500 µl D<sub>2</sub>O of 99.96%  
309 purity. In the final step, LTA and WTA were suspended in 500 µl D<sub>2</sub>O of 99.96% purity and  
310 NMR spectra were recorded on a 600-MHz Bruker Advance III spectrometer equipped with a  
311 TCl cryoprobe. NMR spectra were recorded at 303 K with a total recycling time of 5 s and a

312 <sup>1</sup>H flip angle of approximately 30°. Two independent LTA and WTA extractions were  
313 performed for each strain. The spectra were annotated according to previously published NMR  
314 spectra (Morath et al., 2001, Morath et al., 2002a, Reichmann et al., 2013, Percy et al., 2016,  
315 Rismondo et al., 2018). For the calculation of the ratio of GlcNAc to rhamnose modifications  
316 on WTA, the area under the peaks at 5.1 ppm and 5 ppm corresponding to one proton in  
317 GlcNAc and rhamnose, respectively, were integrated. For the ratio of Galactose:D-alanine  
318 modifications on LTA, the area under the peaks at 5.2 ppm and 4.3 ppm corresponding to one  
319 proton in galactose and the C-H of D-alanine, respectively, were integrated and the ratio  
320 calculated.

321

322 **2.7 Ultra-high performance liquid chromatography tandem mass spectrometry (UPLC-**  
323 **MS/MS).** Purified LTA polymers were depolymerized into monomeric repeating units by  
324 hydrolysis of the phosphodiester bonds using 48% hydrofluoric acid for 20 h at 0°C. The LTA  
325 monomers were then lyophilized and subjected to UPLC-MS/MS analysis as previously  
326 described (Shen et al., 2017). All data were collected and processed using the MassLynx  
327 software, version 4.1 (Waters Corp., USA), and MS spectra were background-corrected by  
328 subtracting the signals between 0–1 min of their respective chromatograms.

329

### 330 **3. RESULTS**

#### 331 **3.1 The predicted *B. subtilis* glycosyltransferases YfhO is sugar- and acceptor-specific**

332 The *B. subtilis* enzymes CsbB and YfhO have recently been shown to be required for the  
333 decoration of LTA with GlcNAc residues (Fig. 1C) (Rismondo et al., 2018). YfhO likely acts  
334 as extracellular GT mediating the transfer of GlcNAc from the C<sub>55</sub>-P-GlcNAc lipid  
335 intermediate on to the LTA backbone (Rismondo et al., 2018). In contrast Lmo1079, the YfhO  
336 homolog of *L. monocytogenes*, is necessary for the modification of WTA with GlcNAc  
337 residues (Fig. 1A) (Rismondo et al., 2018, Denes et al., 2015, Eugster et al., 2015). This  
338 suggests that *B. subtilis* and *L. monocytogenes* YfhO enzymes use the same C<sub>55</sub>-P-GlcNAc  
339 sugar molecule as substrate, however, they use LTA and WTA, respectively, as acceptor  
340 molecules. To further test the sugar and acceptor molecule specificity of the *B. subtilis* YfhO  
341 enzymes, the *B. subtilis* *csbB-yfhO* operon was expressed in *L. monocytogenes* strains lacking  
342 sugar modifications either on LTA (strain 10403SΔ*gtlAB*) or sugar modifications on WTA  
343 (strain 10403SΔ*lmo1079*Δ*lmo2550*). Subsequently, the structures of WTA and LTA were  
344 analyzed by NMR and western blot. As expected, the WTA polymer isolated from the wildtype  
345 *L. monocytogenes* strain 10403S was decorated with GlcNAc residues and this modification

346 was absent in strain 10403S $\Delta$ *lmo1079* $\Delta$ *lmo2550* (Fig. S1). The WTA polymer produced by *L.*  
347 *monocytogenes* strain 10403S $\Delta$ *lmo1079*  $\Delta$ *lmo2550*+*csbB-yfhO* was indistinguishable from the  
348 polymer produced by the *lmo1079/lmo2550* mutant, revealing that the *B. subtilis* CsbB and  
349 YfhO enzymes are unable to glycosylate the WTA of *L. monocytogenes*. Next, cell extracts of  
350 *L. monocytogenes* strains 10403S, 10403S $\Delta$ *gtLAB* and 10403S $\Delta$ *gtLAB*+*csbB-yfhO* were  
351 analyzed by western blot using a polyglycerolphosphate specific antibody, which recognizes  
352 the LTA backbone. In previous studies it has been shown that the absence of sugar  
353 modifications on LTA results in a stronger LTA signal on western blots (Rismondo et al., 2018,  
354 Percy et al., 2016). Consistent with these findings, the signal was increased for the extracts  
355 isolated from the *gtLAB* mutant as compared to the wildtype strain (Fig. 2A). In contrast,  
356 extracts isolated from strain 10403S $\Delta$ *gtLAB*+*csbB-yfhO* produced a low signal (Fig. 2A),  
357 suggesting that the LTA of strain 10403S $\Delta$ *gtLAB*+*csbB-yfhO* is again modified with sugar  
358 residues. To investigate this further, LTA was isolated from wildtype 10403S, the *gtLAB* mutant  
359 and strain 10403S $\Delta$ *gtLAB*+*csbB-yfhO* and analyzed by 1D <sup>1</sup>H NMR and mass spectrometry.  
360 Galactose-specific peaks (colored yellow in Fig. 2) could be detected for the LTA isolated from  
361 the wildtype strain 10403S and were absent in the NMR spectra obtained for the LTA of the  
362 *gtLAB* mutant and *gtLAB* mutant expressing *csbB-yfhO* (Fig. 2B-C). In contrast, four additional  
363 peaks could be detected in the NMR spectra obtained for the LTA isolated from strain  
364 10403S $\Delta$ *gtLAB*+*csbB-yfhO* as compared to the LTA derived from the *gtLAB* mutant (Fig. 2D).  
365 The chemical shifts of these additional peaks differ from those obtained for the galactose  
366 residues and resembled those observed for GlcNAc residues present on *B. subtilis* LTA  
367 (Rismondo et al., 2018). To verify that the LTA produced by strain 10403S $\Delta$ *gtLAB*+*csbB-yfhO*  
368 is indeed decorated with GlcNAc residues, LTA isolated from strains 10403S, 10403S $\Delta$ *gtLAB*  
369 and 10403S $\Delta$ *gtLAB*+*csbB-yfhO* was depolymerized with hydrofluoric acid and analyzed by  
370 UPLC-MS. For the wildtype *L. monocytogenes* strain 10403S, a peak with an m/z of 253.09  
371 was detected corresponding to galactose-glycerol moieties. In contrast, a peak with an m/z of  
372 294.12 was observed for the depolymerized LTA produced by strain 10403S $\Delta$ *gtLAB*+*csbB-*  
373 *yfhO*, consistent with GlcNAc-glycerol moieties. As expected, neither of these two peaks was  
374 detected for the LTA sample isolated from the *gtLAB* mutant (Fig. S2). Taken together, these  
375 results show that the putative glycosyltransferases CsbB and YfhO specifically glycosylate  
376 LTA with GlcNAc residues regardless if they are expressed in *L. monocytogenes* or *B. subtilis*.  
377  
378

### 379 **3.2 GtcA is required for the glycosylation of LTA in *L. monocytogenes* and *B. subtilis***

380 GtlA and CsbB have been identified as putative cytoplasmic GTs and GtlB and YfhO as GTs  
381 with extracellular activity involved in the glycosylation of LTA in *L. monocytogenes* 10403S  
382 and *B. subtilis* 168, respectively (Fig. 1) (Percy et al., 2016, Rismondo et al., 2018). However,  
383 the enzyme involved in the flipping of the lipid-linked sugar intermediate has not been  
384 identified in these two organisms. In Gram-negative bacteria, members of the Wzx family have  
385 been identified as flippases of C<sub>55</sub>-P-linked oligosaccharides such as the C<sub>55</sub>-P-linked O-  
386 antigen subunits (Islam and Lam, 2013, Islam and Lam, 2014). In *Streptococcus pneumoniae*,  
387 Wzx is involved in the transport of the final subunit produced during capsule synthesis  
388 (Robbins et al., 1966, Xayarath and Yother, 2007). Using the *S. pneumoniae* Wzx sequence  
389 (locus tag AF316641\_9) as a query in a BLASTP search, Lmo0215 was identified as the closest  
390 Wzx homolog in *L. monocytogenes* with an amino acid identity of 26%. In addition to Wzx  
391 transporters, members of the GtrA protein family such as GtrA of *Shigella flexneri* and Rv3789  
392 of *Mycobacterium tuberculosis* are thought to be involved in the flipping of lipid-linked sugar  
393 intermediates (Korres et al., 2005, Larrouy-Maumus et al., 2012). In a previous study, it was  
394 shown that GtcA (Lmo2549), a GtrA protein family member, is involved in the glycosylation  
395 of WTA in *L. monocytogenes* (Promadej et al., 1999). To determine if either GtcA or the Wzx  
396 homolog Lmo0215 is required for the glycosylation of LTA in *L. monocytogenes* 10403S, *gtcA*  
397 and *lmo0215* mutants were constructed. Next, cell extracts were prepared from wildtype  
398 10403S, the *gtcA* and *lmo0215* deletion strains and analyzed by western blot using a  
399 polyglycerolphosphate-specific LTA antibody. No difference in signal intensities was  
400 observed between the extracts isolated from the wildtype and  $\Delta$ *lmo0215* mutant strains,  
401 suggesting that the encoded protein is not involved in the LTA glycosylation process. In  
402 contrast, an increased LTA signal was observed for the *gtcA* mutant strain (Fig. 3A). The signal  
403 was of similar intensity to that observed for extracts derived from *gtlA* and *gtlB* mutants, strains  
404 known to lack galactose modifications on their LTA (Fig. 3B). This phenotype could be  
405 complemented by expressing *gtcA* from an IPTG-inducible promoter (Fig. 3B). Indeed, partial  
406 complementation and a reduction in LTA signal could already be seen in the absence of  
407 inducer, indicating basal-level expression of *gtcA* even in the absence of IPTG (Fig. 3A). To  
408 investigate the involvement of GtcA in the LTA glycosylation process further, LTA was  
409 isolated from wildtype 10403S, the *gtcA* deletion and complementation strain (grown in the  
410 presence of 1 mM IPTG) and analyzed by 1D <sup>1</sup>H NMR. This analysis showed that LTA of the  
411  $\Delta$ *gtcA* deletion strain lacks the galactose-specific peaks (Fig. 4B), whereas the LTA derived  
412 from strains 10403S and the *gtcA* complementation strain were glycosylated (Fig. 4A+C).

413 Taken together, these data highlight that GtcA is not only required for the WTA glycosylation  
414 process in *L. monocytogenes* 10403S but also needed for the glycosylation of LTA.

415 In *B. subtilis* 168, *gtcA* is part of the *ywcC-gtcA-galK-galT* operon, also encoding the  
416 TetR-like transcriptional regulator YwcC, the galactokinase GalK and the galactose-1-  
417 phosphate uridylyltransferase GalT (Fig. 5A). To test if GtcA is also involved in the LTA  
418 glycosylation process, *gtcA* deletion and complementation strains were constructed and LTA  
419 production assessed by western blot. A stronger signal was observed for extracts derived from  
420 the *gtcA* mutant compared to the wildtype 168 strain, which was similar to that of the *csbB*  
421 mutant control strain, which is known to lack GlcNAc modification on LTA (Rismondo et al.,  
422 2018) (Fig. 5B). The LTA signal was reduced back to wildtype levels in the *gtcA*  
423 complementation strain 168 $\Delta$ *gtcA*+*ywcC-gtcA*, in which *gtcA* was expressed along with *ywcC*,  
424 the upstream gene, from its native promoter (Fig. 5B). These data indicate that *gtcA* is also  
425 required for the LTA glycosylation process in *B. subtilis* 168. This was further confirmed by  
426 NMR analysis of LTA isolated from the wildtype, *gtcA* mutant and *gtcA* complementation  
427 strains, where GlcNAc-specific peaks could be detected for the wildtype and complementation  
428 strain but not for the *gtcA* mutant (Fig. 5C-E). Taken together, our results show that GtcA is  
429 involved in the LTA glycosylation in both, *B. subtilis* 168 and *L. monocytogenes* 10403S, and  
430 potentially acts as a flippase to transport the C<sub>55</sub>-P-sugar intermediate across the membrane.

431

### 432 **3.3 Identification of amino acids essential for the function of GtcA**

433 GtrA family proteins are thought to act as flippases of lipid-linked sugar intermediates in  
434 different bacteria (Larrouy-Maumus et al., 2012, Kho and Meredith, 2018, Korres et al., 2005,  
435 Promadej et al., 1999). However, so far it is not known which amino acids play an important  
436 role for the function of these proteins. Based on the membrane topology prediction using the  
437 TMHMM server 2.0 (Sonnhammer et al., 1998), the *L. monocytogenes* GtcA protein contains  
438 four transmembrane helices (Fig. 6A). To identify conserved amino acid residues, the *L.*  
439 *monocytogenes* GtcA protein sequence was used in a BLASTP search against the non-  
440 redundant protein data base, the sequences of the top 1000 homologs were aligned using  
441 Jalview (Waterhouse et al., 2009) and a WebLogo generated (Crooks et al., 2004) (Fig. 6B).  
442 Eight amino acids, A65, N69, V73, F74, F91, R95, K121 and N132 located in different parts  
443 of the *L. monocytogenes* GtcA protein (Fig. 6A), were found to be conserved in 99-100% of  
444 the analyzed proteins. To determine, if any of these highly conserved amino acid residues are  
445 important for the activity of GtcA, GtcA and derivatives harbouring single amino acid  
446 substitutions were expressed from an IPTG-inducible promoter in the *L. monocytogenes gtcA*

447 deletion strain. The LTA glycosylation state of strains expressing the different GtcA variants  
448 was assessed by western blot (Fig. 7A) and the WTA glycosylation state was assessed by  
449 fluorescence microscopy using the fluorescently labelled lectin wheat germ agglutinin (WGA)-  
450 Alexa Fluor® 594 conjugate, which recognizes GlcNAc residues on WTA (Loessner et al.,  
451 2002) (Fig. 7B). Wildtype 10403S and the *gtcA* mutant strains were used as controls in these  
452 experiments (Fig. 7). Based on this analysis, the GtcA variants with mutations in the highly  
453 conserved residues could be grouped into four different categories: GtcA variants with  
454 unaltered function (A65S, N69A, V73A), GtcA variants, which showed a defect in both LTA  
455 and WTA glycosylation (R95A, N132A), a GtcA variant which was defective in LTA  
456 glycosylation (K121A) and GtcA variants with a defect in WTA glycosylation (F74A, F91A)  
457 (Fig. 7, Table S3). To determine whether the GtcA derivatives GtcA<sub>F74A</sub>, GtcA<sub>F91A</sub>, GtcA<sub>R95A</sub>,  
458 GtcA<sub>K121A</sub> and GtcA<sub>N132A</sub> fail to participate in the glycosylation processes of LTA and/or WTA  
459 due to differences in protein expression, GtcA and derivatives thereof were expressed in *L.*  
460 *monocytogenes* strain 10403SΔ*gtcA* as His-tag fusion proteins. *L. monocytogenes* strain  
461 10403SΔ*gtcA*+*His-gtcA* produced glycosylated LTA and WTA, suggesting that the N-terminal  
462 His-tag does not ablate the function of the GtcA protein (Fig. S3 and S4). Similar results were  
463 obtained for the *gtcA* deletion strain expressing His-GtcA variants carrying point mutations in  
464 the conserved amino acids as compared to the untagged GtcA variants when the LTA and WTA  
465 glycosylation status was assessed by western blot and fluorescence microscopy, respectively  
466 (Fig. S3A+C, Table S3). Next, protein extracts were prepared from control and *L.*  
467 *monocytogenes* strains expressing the different His-GtcA variants and the His-tagged proteins  
468 detected by western-blot. All His-GtcA proteins could be detected and most proteins were  
469 produced at similar amounts as the wildtype His-GtcA control protein, with exception of His-  
470 GtcA<sub>F74A</sub> and His-GtcA<sub>R95A</sub>, which were produced at slightly lower levels (Fig. S3B). Since  
471 the GtcA variants with the F74A or R95A mutations also showed a defect in function (Fig.  
472 S3A+C, Table S3), we wanted to determine whether the observed reduction in protein  
473 production could be the reason for this as opposed to the actual amino acid substitution. To  
474 assess the impact of reduced GtcA production on LTA and WTA glycosylation, *L.*  
475 *monocytogenes* strain 10403SΔ*gtcA*+*His-gtcA* was grown in the absence of IPTG and LTA  
476 and WTA glycosylation assessed. This analysis revealed that basal expression of His-GtcA is  
477 sufficient to fully reduce the LTA western-blot signal to that of a wild-type strain and partially  
478 restore the glycosylation of WTA as assessed by fluorescence microscopy, even though no  
479 protein could be detected by western blot (Fig. S4). These results indicate that amino acid

480 residues F74 and R95 likely play an important role for the function of GtcA as the reduced  
481 protein production alone cannot explain the observed phenotypes.

482 Through the bioinformatics, mutagenesis, western blot and fluorescent microscopy analysis,  
483 we identified key amino acids in GtcA that appear to play an important role for the  
484 glycosylation of LTA but not WTA glycosylation (K121) and vice versa (F74 and F91). To  
485 determine the actual chemical structure of WTA and LTA produced by such variants, LTA and  
486 WTA were isolated from strains 10403S $\Delta$ gtcA+gtcA, 10403S $\Delta$ gtcA+gtcA<sub>F74A</sub> and  
487 10403S $\Delta$ gtcA+gtcA<sub>K121A</sub>, and analyzed by 1D <sup>1</sup>H NMR. The NMR spectra of WTA extracted  
488 from strains 10403S $\Delta$ gtcA+gtcA and 10403S $\Delta$ gtcA+gtcA<sub>K121A</sub> were comparable to each other  
489 (Fig. 8A+C). In contrast, the GlcNAc-specific peaks were significantly smaller in the NMR  
490 spectra for the WTA produced by strain 10403S $\Delta$ gtcA+gtcA<sub>F74A</sub> (Fig. 8B). To quantify the  
491 structural differences, the ratio of GlcNAc and rhamnose modifications on WTA of the  
492 different strains was calculated as described in the methods section. WTA of *L. monocytogenes*  
493 strains 10403S $\Delta$ gtcA+gtcA and 10403S $\Delta$ gtcA+gtcA<sub>K121A</sub> have a GlcNAc:rhamnose ratio of  
494 around 0.7, whereas a GlcNAc:rhamnose ratio of 0.16 was observed for WTA for strain  
495 10403S $\Delta$ gtcA+gtcA<sub>F74A</sub> (Fig. 8D). Galactose residues could be detected on the LTA produced  
496 in all three *L. monocytogenes* strains (10403S $\Delta$ gtcA+gtcA, 10403S $\Delta$ gtcA+gtcA<sub>F74A</sub> and  
497 10403S $\Delta$ gtcA+gtcA<sub>K121A</sub>) (Fig. 8E-G). However, the calculation of the galactose:D-alanine  
498 ratio (1H galactose peak at 5.2 ppm : C-H D-alanine peak at 4.3 ppm) indicated a slight increase  
499 in glycosylation of LTA in strain 10403S $\Delta$ gtcA+gtcA<sub>F74A</sub> and as expected a decrease in LTA  
500 glycosylation in strain 10403S $\Delta$ gtcA+gtcA<sub>K121A</sub> as compared to the LTA isolated from strain  
501 10403S $\Delta$ gtcA+gtcA (Fig. 8H). Taken together, these data are consistent with the changes  
502 observed in the western blot and microscopy analysis. They indicate a predominant  
503 requirement of residue F74 in GtcA for the glycosylation of WTA with GlcNAc residues  
504 without leading to a reduction in the glycosylation of LTA with galactose. In contrast, residue  
505 K121 is important for the glycosylation of LTA but is not essential for WTA glycosylation.

506

## 507 DISCUSSION

508 Recent studies have provided insight into the protein components forming part of the proposed  
509 three-component glycosylation system required for the glycosylation of LTA in *B. subtilis* and  
510 *S. aureus* and for the glycosylation of both polymers, LTA and WTA, in the *L. monocytogenes*  
511 serovar 1/2a strain 10403S (Kho and Meredith, 2018, Rismondo et al., 2018, Percy et al., 2016).  
512 YfhO, a putative glycosyltransferase, is thought to transfer GlcNAc residues from a C<sub>55</sub>-P-



513 GlcNAc intermediate onto the LTA backbone in *B. subtilis* and *S. aureus* (Kho and Meredith,  
514 2018, Rismondo et al., 2018). Interestingly, the *L. monocytogenes* serovar 1/2a YfhO homolog  
515 Lmo1079, is required for the decoration of WTA with GlcNAc residues rather than the  
516 modification of LTA with galactose residues (Eugster et al., 2015, Rismondo et al., 2018). In  
517 the case of *L. monocytogenes* strain 10403S, the predicted glycosyltransferase GtlB is required  
518 for the modification of LTA with galactose residues. (Rismondo et al., 2018). While YfhO-like  
519 proteins have 12 predicted transmembrane helices and a large outside loop between the last  
520 two helices, GtlB-like proteins possess only eight transmembrane helices and a smaller  
521 extracellular loop located between the first two helices (Rismondo et al., 2018). Such large  
522 sequence differences and the lack of structural information make it hard to bioinformatically  
523 predict which glycosyltransferase is required for decoration of teichoic acids and if they use  
524 LTA or WTA as acceptor molecules. The observation that YfhO of *B. subtilis* and *S. aureus*  
525 and the *L. monocytogenes* 10403S YfhO homolog Lmo1079 are required for the glycosylation  
526 of LTA and WTA, respectively (Eugster et al., 2015, Kho and Meredith, 2018, Rismondo et  
527 al., 2018), suggests that these enzymes specifically recognize their cognate cell wall polymer.  
528 Here, we tested whether the *B. subtilis* enzymes YfhO acts sugar- and acceptor-specific by  
529 expressing the *B. subtilis* *csbB-yfhO* operon in *L. monocytogenes* *gtlAB* or *lmo2550/lmo1079*  
530 deletion strains, which are unable to glycosylate LTA or WTA, respectively. This analysis  
531 showed that expression of the *csbB-yfhO* operon leads to the attachment of GlcNAc residues  
532 onto the LTA polymer in *L. monocytogenes* suggesting that the *B. subtilis* YfhO enzyme  
533 specifically recognizes and transfers GlcNAc residues to the backbone of LTA. Both, *B.*  
534 *subtilis* 168 and *L. monocytogenes* 10403S possess a type I LTA with a GroP backbone (Percy  
535 and Gründling, 2014) and our data indicate that the *B. subtilis* YfhO protein recognizes the  
536 GroP backbone without the need of any additional specificity factors since we only introduced  
537 the *B. subtilis* *csbB-yfhO* operon into *L. monocytogenes*. It is however unclear if in our  
538 experiments the C<sub>55</sub>-P-GlcNAc intermediate used by YfhO is solely produced by the *B. subtilis*  
539 CsbB protein or whether YfhO also utilized the C<sub>55</sub>-P-GlcNAc intermediate produced by the  
540 *L. monocytogenes* GT Lmo2550, which seems more likely. As discussed in more detail below,  
541 the C<sub>55</sub>-P-GlcNAc is likely transported across the membrane by the *L. monocytogenes* GtcA  
542 protein.

543 For the glycosylation of LTA and WTA in *L. monocytogenes*, a C<sub>55</sub>-P-sugar  
544 intermediate needs to be transported across the membrane. Several enzymes have been  
545 proposed for the translocation of lipid-linked sugar intermediates for different glycosylation  
546 processes and biosynthetic pathways. MurJ and Amj have been identified as the enzyme

547 responsible for the flipping of lipid II during peptidoglycan biosynthesis (Fay and Dworkin,  
548 2009, Meeske et al., 2015, Ruiz, 2008, Sham et al., 2014, Inoue et al., 2008). Another class are  
549 Wzx (or RfbX) flippases, which are involved in the flipping of lipid carrier linked O-antigen  
550 repeating units during LPS biosynthesis in *Escherichia coli*, *Salmonella enterica* and *Shigella*  
551 *flexneri* (Liu et al., 1996, Feldman et al., 1999) or the flipping of lipid carrier linked  
552 oligosaccharides during capsule biosynthesis in *Streptococcus pneumoniae* (Bentley et al.,  
553 2006). Both, MurJ and Wzx flippases, belong to the multidrug/oligosaccharidyl  
554 lipid/polysaccharide (MOP) transporter family of proteins (Hvorup et al., 2003) and have 12-  
555 14 transmembrane helices. A third class of proteins involved in the translocation of lipid-linked  
556 intermediates are small multidrug resistance (SMR) transporters, which are small hydrophobic  
557 proteins with four predicted transmembrane helices (Paulsen et al., 1996). The *E. coli*  
558 ArnE/ArnF proteins are members of this family and they are thought to transport a C<sub>55</sub>-P-sugar  
559 intermediate across the membrane, which is necessary for the glycosylation of Lipid A (Yan et  
560 al., 2007). Another member of the SMR family is the *S. flexneri* SfX bacteriophage protein  
561 GtrA (Guan et al., 1999). Indeed, bacteriophage SfX encodes a three-protein glycosylation  
562 system comprised of GtrA, GtrB and GtrX (also referred to as Gtr<sub>type</sub>) and these proteins are  
563 responsible for serotype conversion in *S. flexneri* (Huan et al., 1997a, Huan et al., 1997b,  
564 Mavris et al., 1997). GtrB, a homolog of the *L. monocytogenes* Lmo2550 and GtlA proteins, is  
565 necessary for the formation of a C<sub>55</sub>-P-sugar intermediate, which is flipped across the  
566 membrane by the putative flippase GtrA and subsequently attached to the O-antigen by GtrX  
567 (Guan et al., 1999, Korres et al., 2005, Allison and Verma, 2000). The flippases required for  
568 the translocation of the C<sub>55</sub>-P sugar intermediates during LTA glycosylation in *L.*  
569 *monocytogenes* and *B. subtilis* have not been identified thus far. As part of this study, we show  
570 that Lmo0215, a *L. monocytogenes* protein showing homology to Wzx-type transporters, is not  
571 required for the glycosylation of LTA in *L. monocytogenes*. In contrast, absence of the GtrA  
572 homolog GtcA results in the loss of sugar modifications on LTA in *L. monocytogenes* 10403S  
573 as well as in *B. subtilis* 168. The same protein has been previously shown to be important for  
574 WTA glycosylation in *L. monocytogenes* and *L. innocua* and has been proposed to act as a  
575 flippase enzyme (Promadej et al., 1999, Lan et al., 2000). In addition, a recent study suggested  
576 that a GtcA homologue is responsible for the translocation of C<sub>55</sub>-P-GlcNAc during the LTA  
577 glycosylation process in *S. aureus* (Kho and Meredith, 2018). Members of the GtrA protein  
578 family are usually small and highly hydrophobic proteins, which are predicted to contain three  
579 to four transmembrane helices (TMs) and their function has been associated with the synthesis  
580 of diverse cell surface polysaccharide. In *Mycobacterium smegmatis* and *M. tuberculosis*, the

581 GtrA homolog Rv3789 is involved in the arabinosylation of arabinogalactan and  
582 lipoarabinomannan (Larrouy-Maumus et al., 2012, Kolly et al., 2015). However, there is  
583 conflicting evidence in the literature concerning the role of Rv3789 during the arabinosylation  
584 process. It has been proposed that Rv3789 acts as a flippase enzyme to translocate decaprenyl-  
585 phospho-arabinose (DPA) across the cytoplasmic membrane (Larrouy-Maumus et al., 2012).  
586 However, it has also been suggested that Rv3789 acts as an anchor protein by recruiting other  
587 proteins involved in the arabinogalactan biosynthesis, such as the priming  
588 arabinosyltransferase AftA (Kolly et al., 2015, Brecik et al., 2015). Our data show that GtcA  
589 is involved in the LTA glycosylation process in *L. monocytogenes* and *B. subtilis* and we favor  
590 a model where the protein acts as C<sub>55</sub>-P-sugar flippase enzyme rather than an anchor protein.  
591 However actual biochemical evidence for such an activity is still lacking and will need to be  
592 addressed in future studies.

593 Deletion of *gtcA* in *B. subtilis* 168 resulted in a loss of GlcNAc modifications on LTA.  
594 It is interesting to note that the *B. subtilis* GtcA protein is encoded in an operon with other  
595 genes coding for galactose metabolism proteins (Glaser et al., 1993). The genetic location of  
596 *gtcA* might therefore indicate that GtcA is also required for the glycosylation of a different  
597 polymer or proteins with galactose or a galactose derivative. Similarly, if the *L. monocytogenes*  
598 GtcA protein indeed acts as a flippase enzyme, our results indicate that it has a broader substrate  
599 specificity as it impacts glycosylation of LTA and WTA with galactose and GlcNAc residues,  
600 respectively (Fig. 4, 7B). Whereas *L. monocytogenes* and *S. aureus* only possess one GtcA  
601 protein, two GtrA-like proteins, GtcA and YngA, are encoded in the *B. subtilis* 168 genome.  
602 As deletion of *gtcA* alone leads to a complete absence of GlcNAc residues on LTA in *B.*  
603 *subtilis*, this suggests that under the conditions tested YngA is not required for this process.  
604 We speculate that *B. subtilis* YngA might be involved in a different glycosylation process or is  
605 active under different growth conditions or e.g. during the sporulation process.

606 In accordance with previous studies (Promadej et al., 1999, Kho and Meredith, 2018),  
607 we propose that GtcA acts as a flippase to transport C<sub>55</sub>-P-sugar intermediates across the  
608 membrane, which are afterwards used for the glycosylation of LTA in *B. subtilis* and *L.*  
609 *monocytogenes*. Recently, MurJ has been identified as the lipid II flippase involved in  
610 peptidoglycan biosynthesis. *In vitro* and *in vivo* studies suggest that MurJ functions by an  
611 alternating-access mechanism to transport lipid II across the cell membrane, which is  
612 dependent on a membrane potential and potentially also the binding of a cation (Kuk et al.,  
613 2019, Kuk et al., 2017, Zheng et al., 2018). MurJ contains 14 transmembrane helices, whereas  
614 the putative flippase GtcA only possesses four transmembrane helices. To accommodate the

615 C<sub>55</sub>-P-sugar substrate, we hypothesize that GtcA needs to form a homodimer. GtcA could  
616 function similar to MurJ by an alternating-access mechanism. To this end, the GtcA dimer  
617 would form an inward-facing cavity, which is bound by the C<sub>55</sub>-P-sugar-intermediate. The  
618 binding of the substrate leads to a conformational change, resulting in the flipping of the C<sub>55</sub>-  
619 P-sugar intermediate and the formation of an outward-facing cavity. In the next step, the C<sub>55</sub>-  
620 P-sugar-intermediate is released and can be used by GT-C type glycosyltransferases, such as  
621 the *L. monocytogenes* GtlB or Lmo1079 enzymes, to transfer the sugar onto the LTA and WTA  
622 backbone, respectively. A similar mechanism has also been proposed for the SMR efflux  
623 transporter EmrE from *E. coli* (Schuldiner, 2009, Fleishman et al., 2006). EmrE is involved in  
624 the efflux of a wide range of aromatic cation antibiotics and its activity also depends on the  
625 proton motive force (Paulsen et al., 1993, Yerushalmi et al., 1995, Littlejohn et al., 1992,  
626 Grinius and Goldberg, 1994). EmrE has also been shown to confer resistance to ethidium  
627 bromide and methyl viologen, suggesting a relaxed substrate specificity (Yerushalmi et al.,  
628 1996, Schuldiner et al., 2001, Yerushalmi et al., 1995). EmrE is thought to form an antiparallel  
629 homodimer in the cell (Muth and Schuldiner, 2000, Chen et al., 2007, Ubarretxena-Belandia  
630 et al., 2003), in which the first three transmembrane helices (TMs) of each monomer form the  
631 substrate binding chamber. TM4 of each monomer is required for the dimerization of EmrE  
632 (Chen et al., 2007). A highly conserved glutamine residue at position 14 in EmrE, which is  
633 located in TM1, is important for substrate and proton binding (Muth and Schuldiner, 2000,  
634 Yerushalmi and Schuldiner, 2000). In addition, it has recently been shown that the last amino  
635 acid residue of EmrE, H110, releases protons upon drug binding and that the C-terminal tail  
636 acts like a gate to prevent proton leakage in the absence of a substrate (Thomas et al., 2018).  
637 For GtrA-type proteins such as the *L. monocytogenes* GtcA protein, no motifs or amino acids  
638 important for their activity have been described thus far. Here, we used an alignment of 1000  
639 GtcA protein sequences to identify conserved amino acids. We found eight highly conserved  
640 amino acid residues and by the expression of GtcA variants carrying mutations in these residues  
641 in *L. monocytogenes* we identified residues R95 and N132 as essential for the activity of GtcA.  
642 According to topology predictions, R95 and N132 are located in TM3 and TM4, respectively  
643 (Fig. 6A). But perhaps even more interestingly, we also identified amino acid substitutions in  
644 GtcA, which seem to predominately impacted the glycosylation of WTA (F74A) or LTA  
645 (K121A). GtcA residues F74 and K121 are predicted to be located in the loops between TM2  
646 and TM3 and TM3 and TM4, respectively (Fig. 6A). Due to the observation that amino acid  
647 residue F74 seems to be only important for WTA glycosylation, one might speculate that this  
648 residue is important for the recognition of the C<sub>55</sub>-P-GlcNAc intermediate, but dispensable for

649 the recognition of the C<sub>55</sub>-P-galactose intermediate used for LTA glycosylation and *vice versa*  
650 for amino acid residue K121.

651 Taken together, we could show that the GtrA family protein GtcA is involved in the LTA  
652 glycosylation process in *L. monocytogenes* and *B. subtilis*. With this, we also revealed that the  
653 same small membrane protein and predicted C<sub>55</sub>-P-sugar flippase is required for the LTA and  
654 WTA glycosylation process in the *L. monocytogenes* 1/2a serovar strain 10403S. In addition,  
655 we identified amino acid residues in the *L. monocytogenes* GtcA protein, which are essential  
656 for function and this might help us decipher the mechanism by which these proteins function.  
657 Such protein variants can help us dissect different steps required for protein function such as  
658 protein dimerization, substrate binding and release as well as provide information on substrate  
659 specificity.

660

#### 661 **AUTHOR CONTRIBUTION STATEMENT:**

662 **Jeanine Rismondo:** Conceptualization, Funding acquisition, Investigation, Data analysis,  
663 Supervision, Visualization, Writing – original draft preparation. **Talal F. M. Haddad:**  
664 Investigation, Writing – review & editing. **Yang Shen:** Investigation, Data analysis, Writing –  
665 review & editing. **Martin J. Loessner:** Data analysis, Writing – review & editing. **Angelika**  
666 **Gründling:** Conceptualization, Funding acquisition, Data analysis, Supervision, Writing –  
667 original draft preparation.

668

#### 669 **ACKNOWLEDGEMENTS**

670 This work was funded by the Wellcome Trust grant 210671/Z/18/Z and MRC grant  
671 MR/P011071/1 to AG and the German research foundation (DFG) grant RI 2920/1-1 to JR.  
672 TFMH was supported by an Imperial College UROP Bursary Award. We thank Dr. Samy  
673 Bulous from the Institute of Food, Nutrition and Health, ETH Zürich, for the technical  
674 assistance with the UPLC-MS analysis.

675

676

677 **FIGURES AND FIGURE LEGENDS**

678

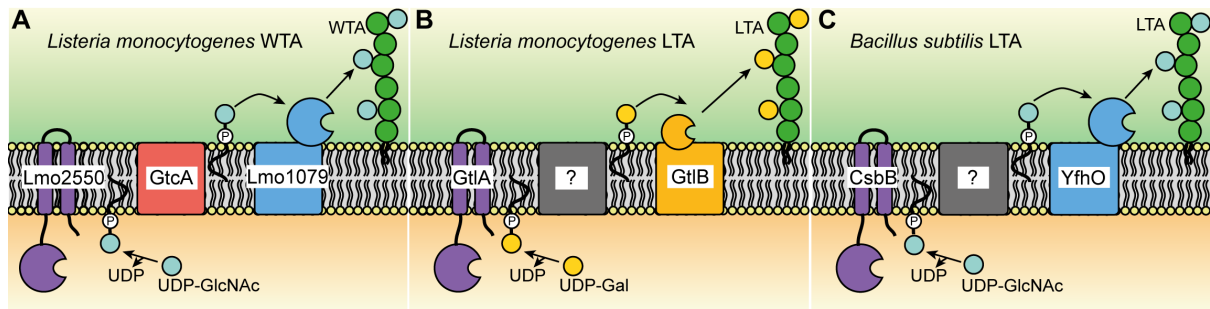

679

680 **Figure 1: Overview over the proposed WTA and LTA glycosylation process in *L.***

681 ***monocytogenes* serovar 1/2a strains and LTA glycosylation in *B. subtilis*.** (A) Model of the

682 WTA glycosylation process in *L. monocytogenes*. The cytoplasmic glycosyltransferase (GT)

683 Lmo2550 uses UDP-GlcNAc to form a C<sub>55</sub>-P-GlcNAc intermediate that is flipped across the

684 membrane by the putative flippase GtcA (Eugster et al., 2011, Promadej et al., 1999, Cheng et

685 al., 2008). Lmo1079 (YfhO), then transfers the GlcNAc residue onto the WTA backbone on

686 the outside of the cell (Eugster et al., 2015). (B) Model of the LTA glycosylation process in *L.*

687 *monocytogenes*. GtlA, the putative cytoplasmic GT, forms a C<sub>55</sub>-P-galactose intermediate

688 (Percy et al., 2016) that is transported across the membrane by an unknown flippase enzyme.

689 The galactose residue is then transferred onto the LTA backbone by the likely GT enzyme GtlB

690 (Rismondo et al., 2018). (C) Model of the LTA glycosylation process in *B. subtilis*. The

691 cytoplasmic GT CsbB transfers GlcNAc residues to the C<sub>55</sub>-P lipid carrier (Rismondo et al.,

692 2018). The C<sub>55</sub>-P-GlcNAc intermediate is subsequently transported across the membrane by

693 an unknown flippase and the GlcNAc residue is transferred onto the LTA backbone by YfhO

694 on the outside of the cell (Rismondo et al., 2018).

695

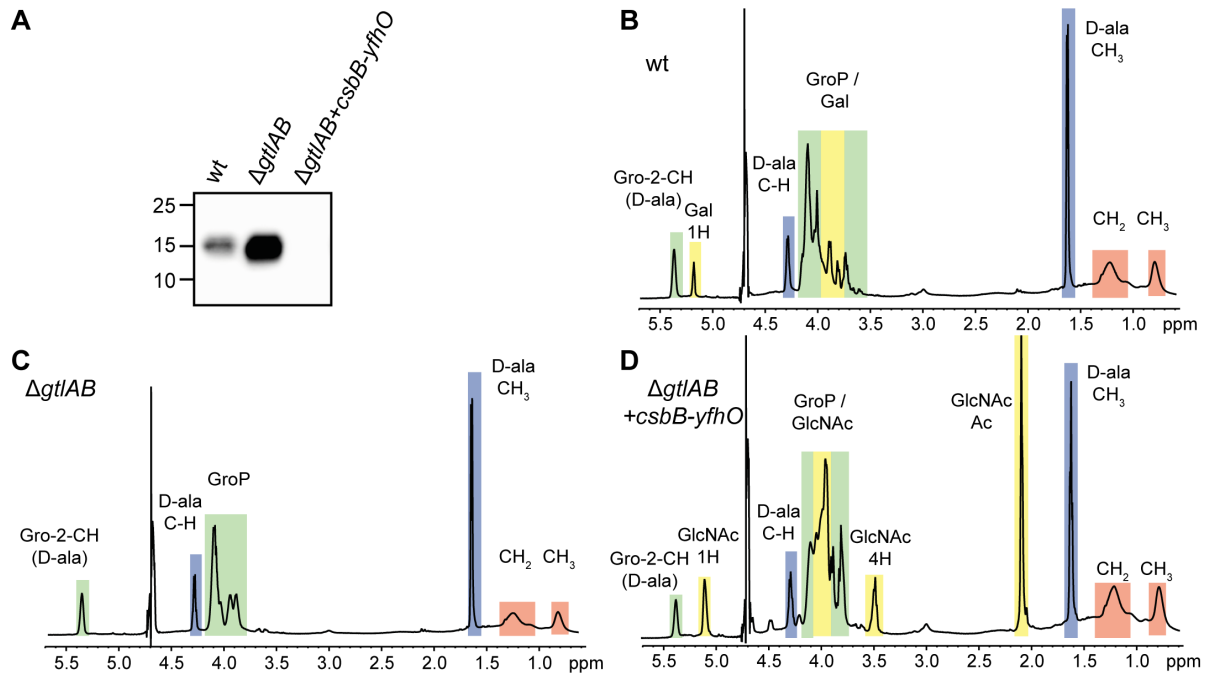

696

697 **Figure 2: LTA in *L. monocytogenes* 10403S is glycosylated with GlcNAc residues upon**  
698 **expression of *B. subtilis* CsbB and YfhO.** (A) Detection of LTA by western blot. Cell extracts  
699 of *L. monocytogenes* strains 10403S (wt), 10403SΔ*gtlAB* and 10403SΔ*gtlAB*+*csbB-yfhO* were  
700 prepared and separated on a 15% SDS-PAGE gel. LTA was detected by western blot using a  
701 polyglycerolphosphate-specific monoclonal antibody. (B-D) NMR spectra of LTA isolated  
702 from *L. monocytogenes* strains 10403S (B), 10403SΔ*gtlAB* or (C) 10403SΔ*gtlAB*+*csbB-yfhO*  
703 (D). Colored boxes and labels indicate nonexchangeable protons derived from the different  
704 LTA components. Peaks were assigned as previously described (Wörmann et al., 2011, Morath  
705 et al., 2001, Morath et al., 2002a, Morath et al., 2002b). The spectra are representatives of three  
706 independent experiments.

707

708

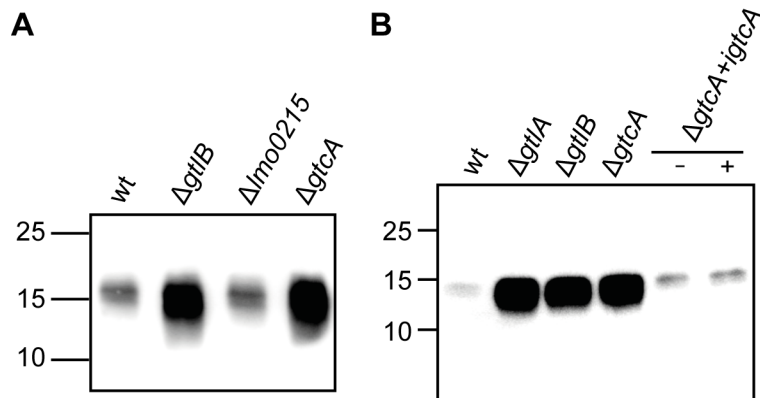

709

710 **Figure 3: LTA production in *L. monocytogenes* wildtype, *gtcA* and *lmo0215* mutant**

711 **strains. (A-B) Detection of LTA by western blot. Cell extracts of *L. monocytogenes* strains**

712 (A) 10403S (wt), the *gtcA* and *lmo0215* mutants or (B) 10403S (wt), the *gtcA* mutant and the

713 *gtcA* complementation strain grown in the absence (-) or presence (+) of IPTG were prepared

714 and separated on a 15% SDS-PAGE gel. LTA was detected by western blot using a

715 polyglycerol-phosphate-specific monoclonal antibody. *L. monocytogenes gtlA* and *gtlB* mutant

716 strains, defective in LTA glycosylation (Percy et al., 2016, Rismondo et al., 2018) were

717 included as positive controls. One representative result of three independent experiments is

718 shown.

719



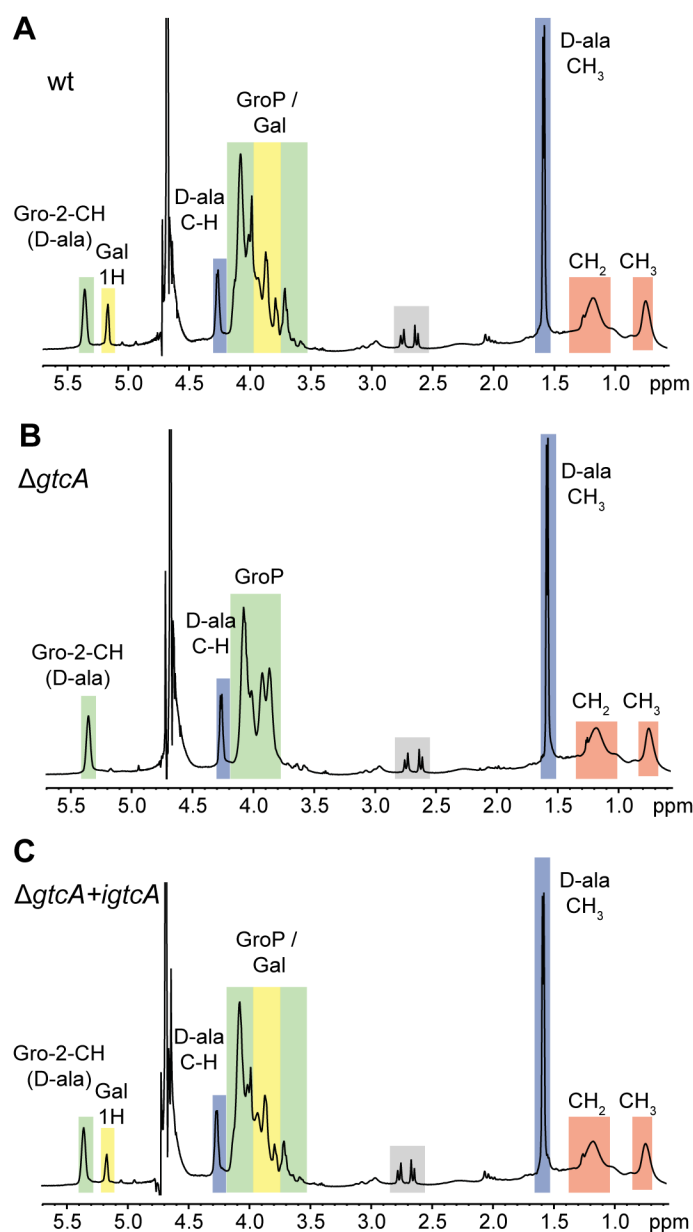

720

721 **Figure 4: NMR analysis of LTA isolated from wildtype *L. monocytogenes* strain 10403S,**

722 **and isogenic *gtcA* mutant and complementation strains. (A-C) NMR spectra of LTA**

723 **produced by *L. monocytogenes* strains (A) 10403S (wt), (B) the *gtcA* mutant and (C) the *gtcA***

724 **complementation strain (grown in presence of IPTG). Peaks of nonexchangeable protons were**

725 **assigned to the different LTA components according to previously published spectra and are**

726 **highlighted in colored boxes (Morath et al., 2001, Morath et al., 2002a, Morath et al., 2002b,**

727 **Wörmann et al., 2011). The spectra are representatives of two independent experiments.**

728

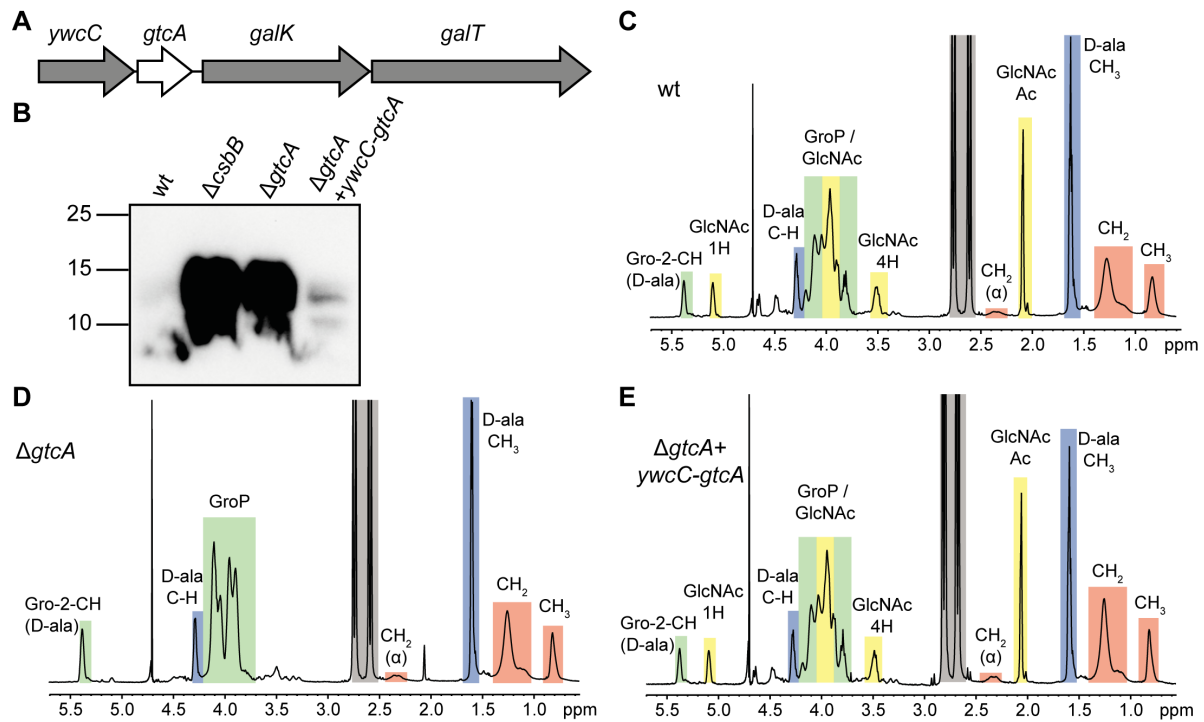

729

730

731

732

733

734

735

736

737

738

739

740

741

742

743

**Figure 5: LTA production and NMR analysis of LTA isolated from wildtype *B. subtilis* 168 and the isogenic *gtcA* mutant and complementation strains.** (A) Schematic representation of the *ywcC-gtcA-galK-galT* operon. (B) Analysis of LTA by western blot. Cell extracts of *B. subtilis* strain 168 (wt), the *gtcA* mutant and the *gtcA* complementation strain (*gtcA+ywcC-gtcA*) were prepared and separated on a 15% SDS-PAGE gel. LTA was detected by western blot using a polyglycerol-phosphate-specific monoclonal antibody. Cell extract of strain *csbB* was included as positive control (Rismondo et al., 2018). One representative result of four independent experiments is shown. (C-E) NMR spectra of LTA produced by (C) *B. subtilis* 168 (wt), (D) the *gtcA* mutant and (E) the *gtcA* complementation strain. Peaks of nonexchangeable protons were assigned to the different LTA components based on previously published spectra and highlighted in colored boxes (Wörmann et al., 2011, Morath et al., 2001, Morath et al., 2002a, Morath et al., 2002b). The spectra are representatives of two independent experiments.

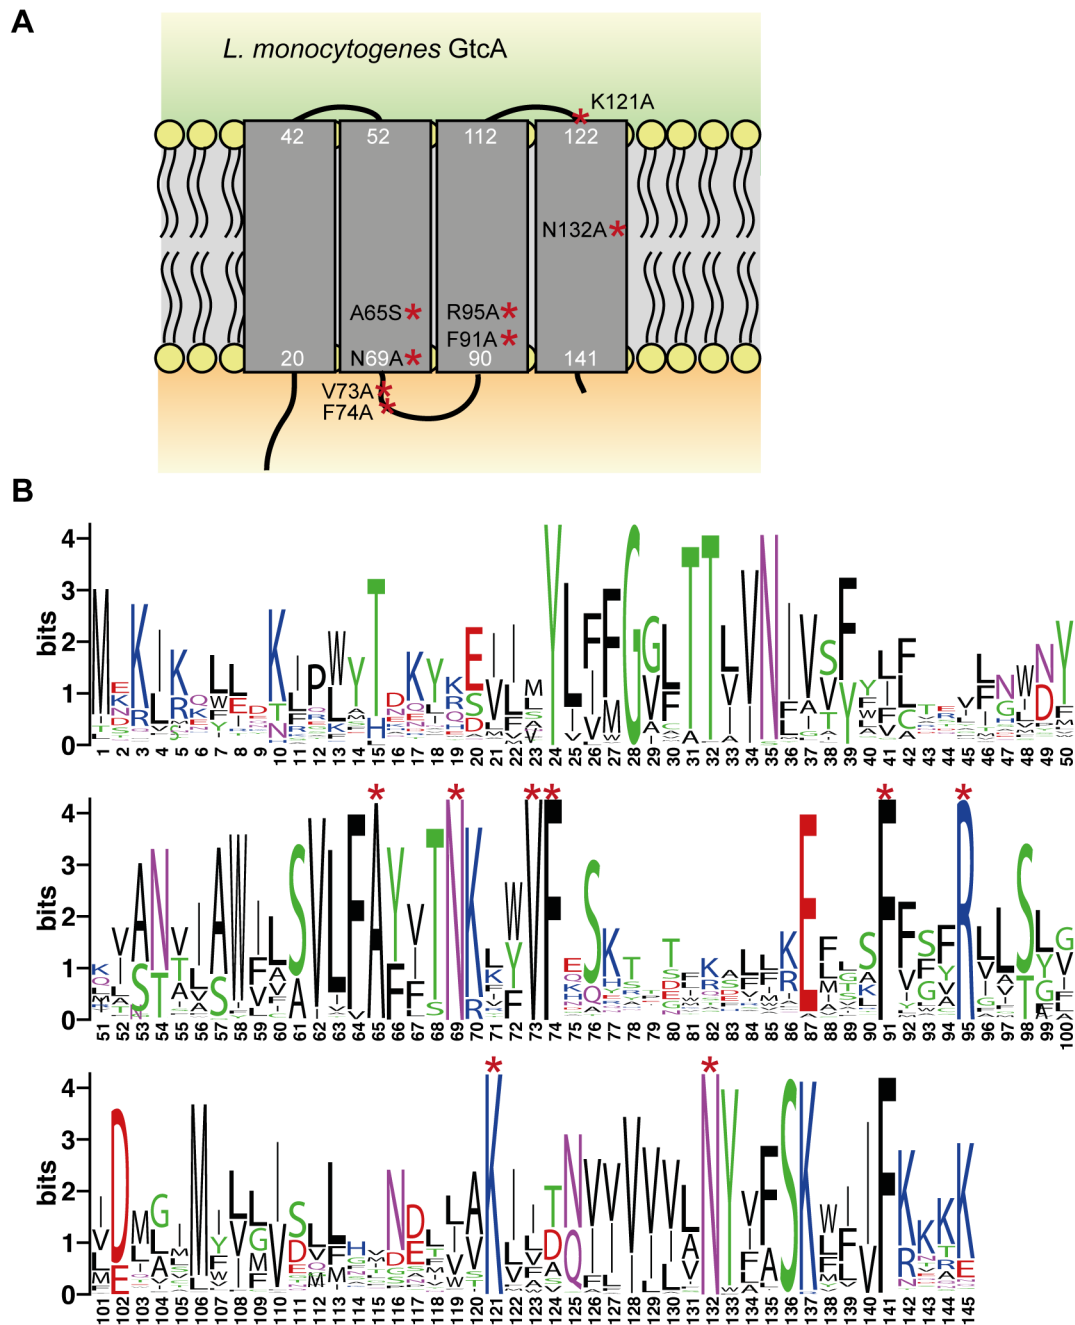

744

745 **Figure 6: Membrane topology model and amino acid conservation of the *L.***

746 ***monocytogenes* 10403S GtcA protein.** (A) Membrane topology model of the *L.*

747 *monocytogenes* protein GtcA based on the prediction using the TMHMM version 2 server  
748 (Sonnhammer et al., 1998). Conserved amino acids mutated as part of this study are indicated.

749 The numbers shown in white indicate the amino acids located at the predicted borders of the

750 TM helices. (B) WebLogo motif of GtcA proteins. *L. monocytogenes* GtcA was used as query

751 sequence in a BLASTP search and the sequences of the top 1000 GtcA homologs downloaded

752 from the NCBI website (on 21.03.2019) and aligned using Jalview (Waterhouse et al., 2009).

753 The alignment was used to generate the presented WebLogo motif (Crooks et al., 2004).

754

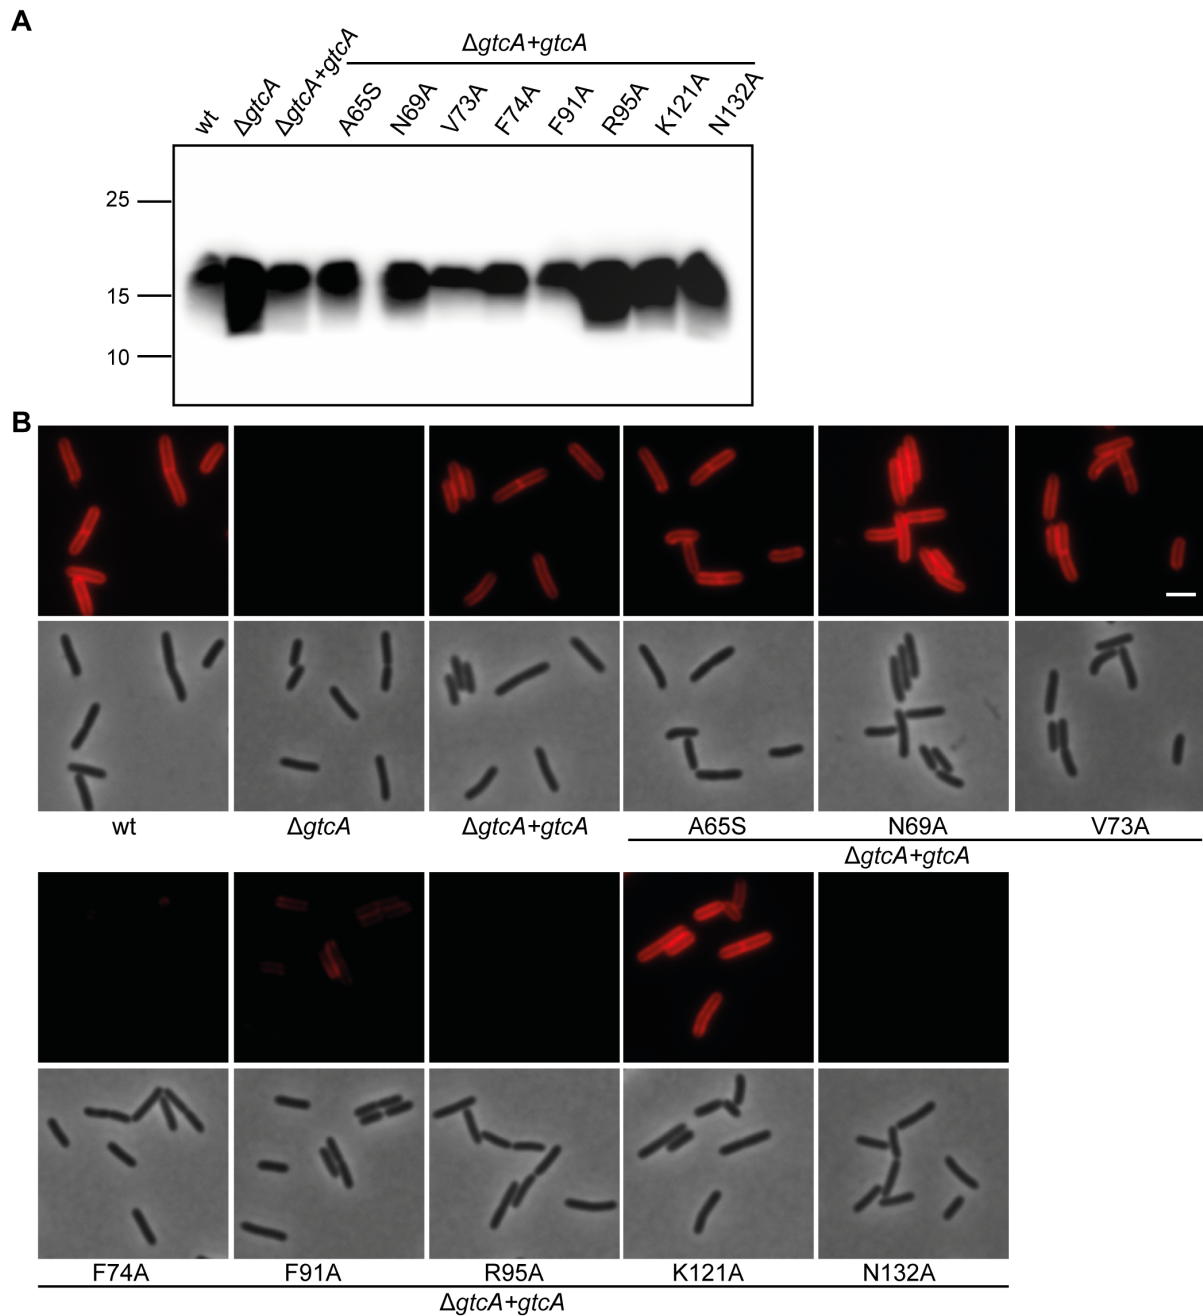

755

756 **Figure 7: Identification of amino acid residues essential for the function and/or stability**

757 **of the *L. monocytogenes* 10403S GtcA protein.** (A) Detection of LTA by western blot. Cell

758 extracts of the indicated *L. monocytogenes* strains were prepared, separated on a 15% SDS

759 PAGE and LTA detected using a polyglycerolphosphate-specific monoclonal antibody. (B)

760 Microscopy analysis and detection of WTA glycosylation using the fluorescently labelled

761 WGA-Alexa 594 lectin. Log-phase cells of the indicated strains were stained with WGA-Alexa

762 594 as described in the methods section and subjected to phase and fluorescence microscopy.

763 Scale bar is 2  $\mu$ m. One representative result of three independent experiments is shown.

764

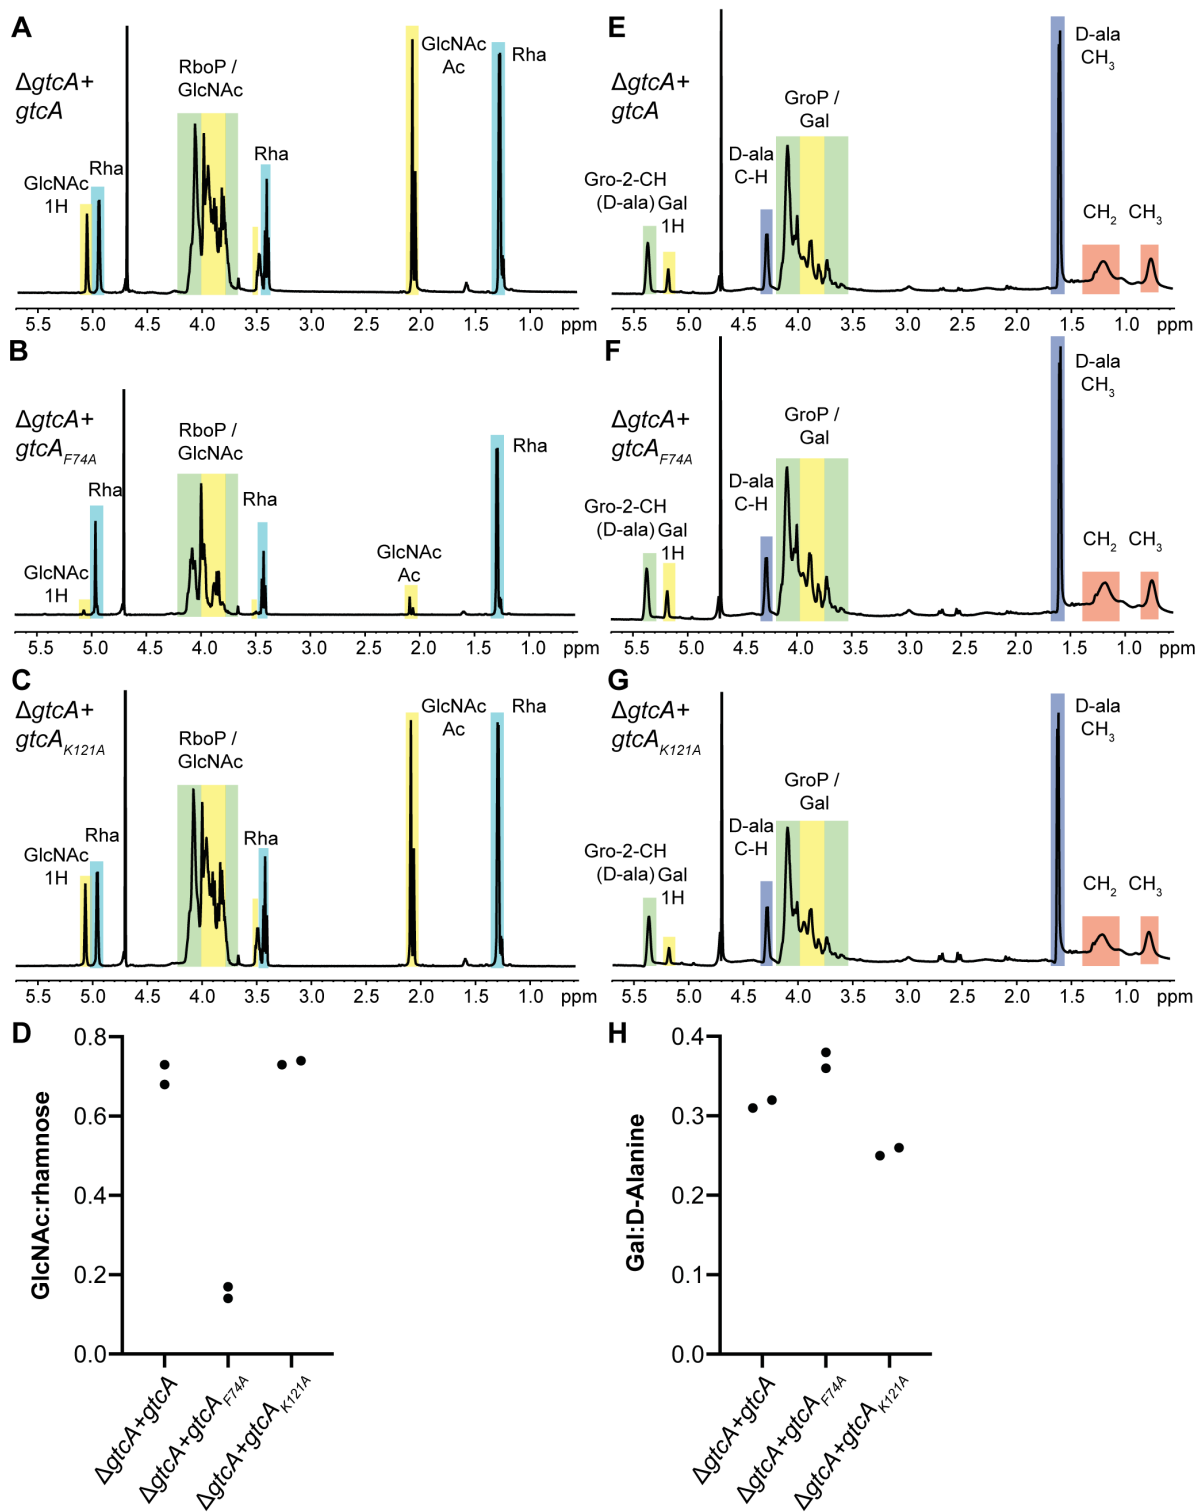

765

766 **Figure 8: Quantification of LTA and WTA sugar modifications in *L. monocytogenes***

767 **10403S producing wildtype GtcA or the GtcA<sub>F74A</sub> or GtcA<sub>K121A</sub> variants. (A-C) NMR**

768 **spectra of WTA. WTA was extracted from *L. monocytogenes* strains (A) 10403S $\Delta gtcA + gtcA$ ,**

769 **(B) 10403S $\Delta gtcA + gtcA_{F74A}$  and (C) 10403S $\Delta gtcA + gtcA_{K121A}$  and analyzed by NMR. The**

770 **spectra are representatives of two independent experiments. (D) Ratio of GlcNAc and**

771 rhamnose modifications on WTA. The peaks at 5.1 ppm and 5 ppm corresponding to 1H of  
772 GlcNAc and rhamnose, respectively, were integrated and the ratio of GlcNAc:rhamnose  
773 calculated and plotted for the two independent WTA extractions. (E-G) NMR spectra of LTA.  
774 LTA was extracted from *L. monocytogenes* strains (E) 10403S $\Delta$ *gtcA*+*gtcA*, (F)  
775 10403S $\Delta$ *gtcA*+*gtcA*<sub>F74A</sub> and (G) 10403S $\Delta$ *gtcA*+*gtcA*<sub>K121A</sub>. The spectra are representatives of  
776 two independent experiments. (H) Ratio of Gal and D-alanine modifications on LTA. The  
777 peaks at 5.2 ppm and 4.3 ppm corresponding to 1H of galactose and C-H of D-alanine,  
778 respectively, were integrated and the ratio of Gal:D-Ala calculated and plotted for the two  
779 independent LTA extractions.  
780

781 **REFERENCES**

- 782 ALLISON, G. E. & VERMA, N. K. 2000. Serotype-converting bacteriophages and O-antigen  
783 modification in *Shigella flexneri*. *Trends Microbiol*, 8, 17-23.
- 784 ALLISON, S. E., D'ELIA, M. A., ARAR, S., MONTEIRO, M. A. & BROWN, E. D. 2011.  
785 Studies of the genetics, function, and kinetic mechanism of TagE, the wall teichoic acid  
786 glycosyltransferase in *Bacillus subtilis* 168. *J Biol Chem*, 286, 23708-16.
- 787 ARAKI, Y. & ITO, E. 1989. Linkage units in cell walls of Gram-positive bacteria. *Crit Rev*  
788 *Microbiol*, 17, 121-35.
- 789 BENTLEY, S. D., AANENSEN, D. M., MAVROIDI, A., SAUNDERS, D.,  
790 RABBINOWITSCH, E., COLLINS, M., DONOHOE, K., HARRIS, D., MURPHY, L.,  
791 QUAIL, M. A., SAMUEL, G., SKOVSTED, I. C., KALTOFT, M. S., BARRELL, B.,  
792 REEVES, P. R., PARKHILL, J. & SPRATT, B. G. 2006. Genetic analysis of the  
793 capsular biosynthetic locus from all 90 pneumococcal serotypes. *PLoS Genet*, 2, e31.
- 794 BHAVSAR, A. P., TRUANT, R. & BROWN, E. D. 2005. The TagB protein in *Bacillus subtilis*  
795 168 is an intracellular peripheral membrane protein that can incorporate glycerol  
796 phosphate onto a membrane-bound acceptor *in vitro*. *J Biol Chem*, 280, 36691-700.
- 797 BRECIK, M., CENTAROVA, I., MUKHERJEE, R., KOLLY, G. S., HUSZAR, S.,  
798 BOBOVSKA, A., KILACSKOVA, E., MOKOSOVA, V., SVETLIKOVA, Z.,  
799 SARKAN, M., NERES, J., KORDULAKOVA, J., COLE, S. T. & MIKUSOVA, K.  
800 2015. DprE1 Is a vulnerable tuberculosis drug target due to its cell wall localization.  
801 *ACS Chem Biol*, 10, 1631-6.
- 802 BROWN, S., MEREDITH, T., SWOBODA, J. & WALKER, S. 2010. *Staphylococcus aureus*  
803 and *Bacillus subtilis* W23 make polyribitol wall teichoic acids using different  
804 enzymatic pathways. *Chemistry & biology*, 17, 1101-1110.
- 805 BROWN, S., SANTA MARIA, J. P., JR. & WALKER, S. 2013. Wall teichoic acids of gram-  
806 positive bacteria. *Annu Rev Microbiol*, 67, 313-36.
- 807 BROWN, S., XIA, G., LUHACHACK, L. G., CAMPBELL, J., MEREDITH, T. C., CHEN,  
808 C., WINSTEL, V., GEKELER, C., IRAZOQUI, J. E., PESCHEL, A. & WALKER, S.  
809 2012. Methicillin resistance in *Staphylococcus aureus* requires glycosylated wall  
810 teichoic acids. *Proc Natl Acad Sci U S A*, 109, 18909-14.
- 811 CAMILLI, A., TILNEY, L. G. & PORTNOY, D. A. 1993. Dual roles of *plcA* in *Listeria*  
812 *monocytogenes* pathogenesis. *Mol Microbiol*, 8, 143-57.
- 813 CHEN, Y. J., PORNILLOS, O., LIEU, S., MA, C., CHEN, A. P. & CHANG, G. 2007. X-ray  
814 structure of EmrE supports dual topology model. *Proc Natl Acad Sci U S A*, 104, 18999-  
815 9004.
- 816 CHENG, Y., PROMADEJ, N., KIM, J. W. & KATHARIOU, S. 2008. Teichoic acid  
817 glycosylation mediated by *gtcA* is required for phage adsorption and susceptibility of  
818 *Listeria monocytogenes* serotype 4b. *Appl Environ Microbiol*, 74, 1653-5.
- 819 CROOKS, G. E., HON, G., CHANDONIA, J. M. & BRENNER, S. E. 2004. WebLogo: a  
820 sequence logo generator. *Genome Res*, 14, 1188-90.
- 821 DENES, T., DEN BAKKER, H. C., TOKMAN, J. I., GULDIMANN, C. & WIEDMANN, M.  
822 2015. Selection and Characterization of Phage-Resistant Mutant Strains of *Listeria*  
823 *monocytogenes* Reveal Host Genes Linked to Phage Adsorption. *Appl Environ*  
824 *Microbiol*, 81, 4295-305.
- 825 DENGLER, V., MEIER, P. S., HEUSSER, R., KUPFERSCHMIED, P., FAZEKAS, J.,  
826 FRIEBE, S., STAUFER, S. B., MAJCHERCZYK, P. A., MOREILLON, P., BERGER-  
827 BACHI, B. & MCCALLUM, N. 2012. Deletion of hypothetical wall teichoic acid  
828 ligases in *Staphylococcus aureus* activates the cell wall stress response. *FEMS*  
829 *Microbiol Lett*, 333, 109-20.

- 830 EUGSTER, M. R., HAUG, M. C., HUWILER, S. G. & LOESSNER, M. J. 2011. The cell wall  
831 binding domain of *Listeria* bacteriophage endolysin PlyP35 recognizes terminal  
832 GlcNAc residues in cell wall teichoic acid. *Mol Microbiol*, 81, 1419-32.
- 833 EUGSTER, M. R., MORAX, L. S., HULS, V. J., HUWILER, S. G., LECLERCQ, A.,  
834 LECUIT, M. & LOESSNER, M. J. 2015. Bacteriophage predation promotes serovar  
835 diversification in *Listeria monocytogenes*. *Mol Microbiol*, 97, 33-46.
- 836 FAY, A. & DWORKIN, J. 2009. *Bacillus subtilis* homologs of MviN (MurJ), the putative  
837 *Escherichia coli* lipid II flippase, are not essential for growth. *J Bacteriol*, 191, 6020-  
838 8.
- 839 FELDMAN, M. F., MAROLDA, C. L., MONTEIRO, M. A., PERRY, M. B., PARODI, A. J.  
840 & VALVANO, M. A. 1999. The activity of a putative polyisoprenol-linked sugar  
841 translocase (Wzx) involved in *Escherichia coli* O antigen assembly is independent of  
842 the chemical structure of the O repeat. *J Biol Chem*, 274, 35129-38.
- 843 FISCHER, W. 1994. Lipoteichoic acid and lipids in the membrane of *Staphylococcus aureus*.  
844 *Med Microbiol Immunol*, 183, 61-76.
- 845 FLEISHMAN, S. J., HARRINGTON, S. E., ENOSH, A., HALPERIN, D., TATE, C. G. &  
846 BEN-TAL, N. 2006. Quasi-symmetry in the cryo-EM structure of EmrE provides the  
847 key to modeling its transmembrane domain. *J Mol Biol*, 364, 54-67.
- 848 GERLACH, D., GUO, Y., DE CASTRO, C., KIM, S. H., SCHLATTERER, K., XU, F. F.,  
849 PEREIRA, C., SEEBERGER, P. H., ALI, S., CODEE, J., SIRISARN, W., SCHULTE,  
850 B., WOLZ, C., LARSEN, J., MOLINARO, A., LEE, B. L., XIA, G., STEHLE, T. &  
851 PESCHEL, A. 2018. Methicillin-resistant *Staphylococcus aureus* alters cell wall  
852 glycosylation to evade immunity. *Nature*, 563, 705-709.
- 853 GINSBERG, C., ZHANG, Y. H., YUAN, Y. & WALKER, S. 2006. In vitro reconstitution of  
854 two essential steps in wall teichoic acid biosynthesis. *ACS Chem Biol*, 1, 25-8.
- 855 GLASER, P., KUNST, F., ARNAUD, M., COUDART, M. P., GONZALES, W., HULLO, M.  
856 F., IONESCU, M., LUBOCHINSICY, B., MARCELINO, L., MOSZER, I.,  
857 PRESECAN, E., SANTANA, M., SCHNEIDER, E., SCHWELZER, J., VERTES, A.,  
858 RAPOPORT, G. & DANCHIN, A. 1993. *Bacillus subtilis* genome project: cloning and  
859 sequencing of the 97 kb region from 325 degrees to 333deg. *Mol Microbiol*, 10, 371-  
860 384.
- 861 GRINIUS, L. L. & GOLDBERG, E. B. 1994. Bacterial multidrug resistance is due to a single  
862 membrane protein which functions as a drug pump. *J Biol Chem*, 269, 29998-30004.
- 863 GRÜNDLING, A. & SCHNEEWIND, O. 2007a. Genes required for glycolipid synthesis and  
864 lipoteichoic acid anchoring in *Staphylococcus aureus*. *J Bacteriol*, 189, 2521-30.
- 865 GRÜNDLING, A. & SCHNEEWIND, O. 2007b. Synthesis of glycerol phosphate lipoteichoic  
866 acid in *Staphylococcus aureus*. *Proc Natl Acad Sci U S A*, 104, 8478-83.
- 867 GUAN, S., BASTIN, D. A. & VERMA, N. K. 1999. Functional analysis of the O antigen  
868 glucosylation gene cluster of *Shigella flexneri* bacteriophage SfX. *Microbiology*, 145 (Pt 5), 1263-73.
- 870 HARKNESS, R. E. & BRAUN, V. 1989. Colicin M inhibits peptidoglycan biosynthesis by  
871 interfering with lipid carrier recycling. *J Biol Chem*, 264, 6177-82.
- 872 HUAN, P. T., BASTIN, D. A., WHITTLE, B. L., LINDBERG, A. A. & VERMA, N. K. 1997a.  
873 Molecular characterization of the genes involved in O-antigen modification,  
874 attachment, integration and excision in *Shigella flexneri* bacteriophage SfV. *Gene*, 195,  
875 217-27.
- 876 HUAN, P. T., WHITTLE, B. L., BASTIN, D. A., LINDBERG, A. A. & VERMA, N. K. 1997b.  
877 *Shigella flexneri* type-specific antigen V: cloning, sequencing and characterization of  
878 the glucosyl transferase gene of temperate bacteriophage SfV. *Gene*, 195, 207-16.



- 879 HVORUP, R. N., WINNEN, B., CHANG, A. B., JIANG, Y., ZHOU, X. F. & SAIER, M. H.,  
880 JR. 2003. The multidrug/oligosaccharidyl-lipid/polysaccharide (MOP) exporter  
881 superfamily. *Eur J Biochem*, 270, 799-813.
- 882 INOUE, A., MURATA, Y., TAKAHASHI, H., TSUJI, N., FUJISAKI, S. & KATO, J. 2008.  
883 Involvement of an essential gene, *mviN*, in murein synthesis in *Escherichia coli*. *J*  
884 *Bacteriol*, 190, 7298-301.
- 885 ISLAM, S. T. & LAM, J. S. 2013. Wzx flippase-mediated membrane translocation of sugar  
886 polymer precursors in bacteria. *Environ Microbiol*, 15, 1001-15.
- 887 ISLAM, S. T. & LAM, J. S. 2014. Synthesis of bacterial polysaccharides via the Wzx/Wzy-  
888 dependent pathway. *Can J Microbiol*, 60, 697-716.
- 889 IWASAKI, H., SHIMADA, A., YOKOYAMA, K. & ITO, E. 1989. Structure and  
890 glycosylation of lipoteichoic acids in *Bacillus* strains. *J Bacteriol*, 171, 424-9.
- 891 JORASCH, P., WOLTER, F. P., ZHRINGER, U. & HEINZ, E. 1998. A UDP  
892 glucosyltransferase from *Bacillus subtilis* successively transfers up to four glucose  
893 residues to 1,2-diacylglycerol: expression of *ypfP* in *Escherichia coli* and structural  
894 analysis of its reaction products. *Mol Microbiol*, 29, 419-30.
- 895 KAWAI, Y., MARLES-WRIGHT, J., CLEVERLEY, R. M., EMMINS, R., ISHIKAWA, S.,  
896 KUWANO, M., HEINZ, N., BUI, N. K., HOYLAND, C. N., OGASAWARA, N.,  
897 LEWIS, R. J., VOLLMER, W., DANIEL, R. A. & ERRINGTON, J. 2011. A  
898 widespread family of bacterial cell wall assembly proteins. *EMBO J*, 30, 4931-41.
- 899 KENNEDY, E. P. 1987. Membrane-derived oligosaccharides. In *Escherichia coli and*  
900 *Salmonella typhimurium: Cellular and Molecular Biology*. Washington, DC: American  
901 Society for Microbiology.
- 902 KHO, K. & MEREDITH, T. C. 2018. Salt-Induced Stress Stimulates a Lipoteichoic Acid-  
903 Specific Three-Component Glycosylation System in *Staphylococcus aureus*. *J*  
904 *Bacteriol*, 200.
- 905 KIRIUKHIN, M. Y., DEBABOV, D. V., SHINABARGER, D. L. & NEUHAUS, F. C. 2001.  
906 Biosynthesis of the glycolipid anchor in lipoteichoic acid of *Staphylococcus aureus*  
907 RN4220: role of YpfP, the diglucosyldiacylglycerol synthase. *J Bacteriol*, 183, 3506-  
908 14.
- 909 KOLLY, G. S., MUKHERJEE, R., KILACSKOVA, E., ABRIATA, L. A., RACCAUD, M.,  
910 BLASKO, J., SALA, C., DAL PERARO, M., MIKUSOVA, K. & COLE, S. T. 2015.  
911 GtrA Protein Rv3789 Is Required for Arabinosylation of Arabinogalactan in  
912 *Mycobacterium tuberculosis*. *J Bacteriol*, 197, 3686-97.
- 913 KORRES, H., MAVRIS, M., MORONA, R., MANNING, P. A. & VERMA, N. K. 2005.  
914 Topological analysis of GtrA and GtrB proteins encoded by the serotype-converting  
915 cassette of *Shigella flexneri*. *Biochem Biophys Res Commun*, 328, 1252-60.
- 916 KUK, A. C., MASHALIDIS, E. H. & LEE, S. Y. 2017. Crystal structure of the MOP flippase  
917 MurJ in an inward-facing conformation. *Nat Struct Mol Biol*, 24, 171-176.
- 918 KUK, A. C. Y., HAO, A., GUAN, Z. & LEE, S. Y. 2019. Visualizing conformation transitions  
919 of the Lipid II flippase MurJ. *Nat Commun*, 10, 1736.
- 920 LAN, Z., FIEDLER, F. & KATHARIOU, S. 2000. A sheep in wolf's clothing: *Listeria innocua*  
921 strains with teichoic acid-associated surface antigens and genes characteristic of  
922 *Listeria monocytogenes* serogroup 4. *J Bacteriol*, 182, 6161-8.
- 923 LARROUY-MAUMUS, G., SKOVIEROVA, H., DHOUIB, R., ANGALA, S. K.,  
924 ZUBEROGOITIA, S., PHAM, H., VILLELA, A. D., MIKUSOVA, K., NOGUERA,  
925 A., GILLERON, M., VALENTINOVA, L., KORDULAKOVA, J., BRENNAN, P. J.,  
926 PUZO, G., NIGOU, J. & JACKSON, M. 2012. A small multidrug resistance-like  
927 transporter involved in the arabinosylation of arabinogalactan and lipoarabinomannan  
928 in mycobacteria. *J Biol Chem*, 287, 39933-41.

- 929 LAZAREVIC, V. & KARAMATA, D. 1995. The *tagGH* operon of *Bacillus subtilis* 168  
930 encodes a two-component ABC transporter involved in the metabolism of two wall  
931 teichoic acids. *Mol Microbiol*, 16, 345-55.
- 932 LITTLEJOHN, T. G., PAULSEN, I. T., GILLESPIE, M. T., TENNENT, J. M., MIDGLEY,  
933 M., JONES, I. G., PUREWAL, A. S. & SKURRAY, R. A. 1992. Substrate specificity  
934 and energetics of antiseptic and disinfectant resistance in *Staphylococcus aureus*.  
935 *FEMS Microbiol Lett*, 74, 259-65.
- 936 LIU, D., COLE, R. A. & REEVES, P. R. 1996. An O-antigen processing function for Wzx  
937 (RfbX): a promising candidate for O-unit flippase. *J Bacteriol*, 178, 2102-7.
- 938 LOESSNER, M. J., KRAMER, K., EBEL, F. & SCHERER, S. 2002. C-terminal domains of  
939 *Listeria monocytogenes* bacteriophage murein hydrolases determine specific  
940 recognition and high-affinity binding to bacterial cell wall carbohydrates. *Mol*  
941 *Microbiol*, 44, 335-49.
- 942 MANCUSO, D. J. & CHIU, T. H. 1982. Biosynthesis of glucosyl monophosphoryl  
943 undecaprenol and its role in lipoteichoic acid biosynthesis. *J Bacteriol*, 152, 616-25.
- 944 MAVRIS, M., MANNING, P. A. & MORONA, R. 1997. Mechanism of bacteriophage Sfil-  
945 mediated serotype conversion in *Shigella flexneri*. *Mol Microbiol*, 26, 939-50.
- 946 MEESKE, A. J., SHAM, L. T., KIMSEY, H., KOO, B. M., GROSS, C. A., BERNHARDT, T.  
947 G. & RUDNER, D. Z. 2015. MurJ and a novel lipid II flippase are required for cell wall  
948 biogenesis in *Bacillus subtilis*. *Proc Natl Acad Sci U S A*, 112, 6437-42.
- 949 MORATH, S., GEYER, A. & HARTUNG, T. 2001. Structure-function relationship of  
950 cytokine induction by lipoteichoic acid from *Staphylococcus aureus*. *J Exp Med*, 193,  
951 393-7.
- 952 MORATH, S., GEYER, A., SPREITZER, I., HERMANN, C. & HARTUNG, T. 2002a.  
953 Structural decomposition and heterogeneity of commercial lipoteichoic Acid  
954 preparations. *Infect Immun*, 70, 938-44.
- 955 MORATH, S., STADELMAIER, A., GEYER, A., SCHMIDT, R. R. & HARTUNG, T. 2002b.  
956 Synthetic lipoteichoic acid from *Staphylococcus aureus* is a potent stimulus of cytokine  
957 release. *J Exp Med*, 195, 1635-40.
- 958 MUTH, T. R. & SCHULDINER, S. 2000. A membrane-embedded glutamate is required for  
959 ligand binding to the multidrug transporter EmrE. *EMBO J*, 19, 234-40.
- 960 NEUHAUS, F. C. & BADDILEY, J. 2003. A continuum of anionic charge: structures and  
961 functions of D-alanyl-teichoic acids in Gram-positive bacteria. *Microbiol Mol Biol Rev*,  
962 67, 686-723.
- 963 PAULSEN, I. T., LITTLEJOHN, T. G., RADSTROM, P., SUNDSTROM, L., SKOLD, O.,  
964 SWEDBERG, G. & SKURRAY, R. A. 1993. The 3' conserved segment of integrons  
965 contains a gene associated with multidrug resistance to antiseptics and disinfectants.  
966 *Antimicrob Agents Chemother*, 37, 761-8.
- 967 PAULSEN, I. T., SKURRAY, R. A., TAM, R., SAIER, M. H., JR., TURNER, R. J., WEINER,  
968 J. H., GOLDBERG, E. B. & GRINIUS, L. L. 1996. The SMR family: a novel family  
969 of multidrug efflux proteins involved with the efflux of lipophilic drugs. *Mol Microbiol*,  
970 19, 1167-75.
- 971 PERCY, M. G. & GRÜNDLING, A. 2014. Lipoteichoic acid synthesis and function in Gram-  
972 positive bacteria. *Annu Rev Microbiol*, 68, 81-100.
- 973 PERCY, M. G., KARINOU, E., WEBB, A. J. & GRÜNDLING, A. 2016. Identification of a  
974 Lipoteichoic Acid Glycosyltransferase Enzyme Reveals that GW-Domain-Containing  
975 Proteins Can Be Retained in the Cell Wall of *Listeria monocytogenes* in the Absence  
976 of Lipoteichoic Acid or Its Modifications. *J Bacteriol*, 198, 2029-42.
- 977 PEREGO, M., GLASER, P., MINUTELLO, A., STRAUCH, M. A., LEOPOLD, K. &  
978 FISCHER, W. 1995. Incorporation of D-alanine into lipoteichoic acid and wall teichoic

- 979 acid in *Bacillus subtilis*. Identification of genes and regulation. *J Biol Chem*, 270,  
980 15598-606.
- 981 PEREIRA, M. P., SCHERTZER, J. W., D'ELIA, M. A., KOTEVA, K. P., HUGHES, D. W.,  
982 WRIGHT, G. D. & BROWN, E. D. 2008. The wall teichoic acid polymerase TagF  
983 efficiently synthesizes poly(glycerol phosphate) on the TagB product lipid III.  
984 *Chembiochem*, 9, 1385-90.
- 985 PROMADEJ, N., FIEDLER, F., COSSART, P., DRAMSI, S. & KATHARIOU, S. 1999. Cell  
986 wall teichoic acid glycosylation in *Listeria monocytogenes* serotype 4b requires *gtcA*,  
987 a novel, serogroup-specific gene. *J Bacteriol*, 181, 418-25.
- 988 REICHMANN, N. T., CASSONA, C. P. & GRÜNDLING, A. 2013. Revised mechanism of  
989 D-alanine incorporation into cell wall polymers in Gram-positive bacteria.  
990 *Microbiology*, 159, 1868-77.
- 991 RISMONDO, J., PERCY, M. G. & GRÜNDLING, A. 2018. Discovery of genes required for  
992 lipoteichoic acid glycosylation predicts two distinct mechanisms for wall teichoic acid  
993 glycosylation. *J Biol Chem*, 293, 3293-3306.
- 994 ROBBINS, P. W., WRIGHT, A. & DANKERT, M. 1966. Polysaccharide biosynthesis. *J Gen  
995 Physiol*, 49, 331-46.
- 996 RUIZ, N. 2008. Bioinformatics identification of MurJ (MviN) as the peptidoglycan lipid II  
997 flippase in *Escherichia coli*. *Proc Natl Acad Sci U S A*, 105, 15553-7.
- 998 SCHÄGGGER, H. & VON JAGOW, G. 1987. Tricine-sodium dodecyl sulfate-polyacrylamide  
999 gel electrophoresis for the separation of proteins in the range from 1 to 100 kDa. *Anal  
1000 Biochem*, 166, 368-79.
- 1001 SCHERTZER, J. W. & BROWN, E. D. 2003. Purified, recombinant TagF protein from  
1002 *Bacillus subtilis* 168 catalyzes the polymerization of glycerol phosphate onto a  
1003 membrane acceptor *in vitro*. *J Biol Chem*, 278, 18002-7.
- 1004 SCHIRNER, K., MARLES-WRIGHT, J., LEWIS, R. J. & ERRINGTON, J. 2009. Distinct and  
1005 essential morphogenic functions for wall- and lipo-teichoic acids in *Bacillus subtilis*.  
1006 *EMBO J*, 28, 830-42.
- 1007 SCHULDINER, S. 2009. EmrE, a model for studying evolution and mechanism of ion-coupled  
1008 transporters. *Biochim Biophys Acta*, 1794, 748-62.
- 1009 SCHULDINER, S., GRANOT, D., MORDOCH, S. S., NINIO, S., ROTEM, D., SOSKIN, M.,  
1010 TATE, C. G. & YERUSHALMI, H. 2001. Small is mighty: EmrE, a multidrug  
1011 transporter as an experimental paradigm. *News Physiol Sci*, 16, 130-4.
- 1012 SHAM, L. T., BUTLER, E. K., LEBAR, M. D., KAHNE, D., BERNHARDT, T. G. & RUIZ,  
1013 N. 2014. Bacterial cell wall. MurJ is the flippase of lipid-linked precursors for  
1014 peptidoglycan biogenesis. *Science*, 345, 220-2.
- 1015 SHEN, Y., BOULOS, S., SUMRALL, E., GERBER, B., JULIAN-RODERO, A., EUGSTER,  
1016 M. R., FIESELER, L., NYSTROM, L., EBERT, M. O. & LOESSNER, M. J. 2017.  
1017 Structural and functional diversity in *Listeria* cell wall teichoic acids. *J Biol Chem*, 292,  
1018 17832-17844.
- 1019 SOLDO, B., LAZAREVIC, V. & KARAMATA, D. 2002. *tagO* is involved in the synthesis of  
1020 all anionic cell-wall polymers in *Bacillus subtilis* 168. *Microbiology*, 148, 2079-87.
- 1021 SONNHAMMER, E. L., VON HEIJNE, G. & KROGH, A. 1998. A hidden Markov model for  
1022 predicting transmembrane helices in protein sequences. *Proc Int Conf Intell Syst Mol  
1023 Biol*, 6, 175-82.
- 1024 SPEARS, P. A., HAVELL, E. A., HAMRICK, T. S., GOFORTH, J. B., LEVINE, A. L.,  
1025 ABRAHAM, S. T., HEISS, C., AZADI, P. & ORNDORFF, P. E. 2016. *Listeria  
1026 monocytogenes* wall teichoic acid decoration in virulence and cell-to-cell spread. *Mol  
1027 Microbiol*, 101, 714-30.

- 1028 SUMRALL, E. T., SHEN, Y., KELLER, A. P., RISMONDO, J., PAVLOU, M., EUGSTER,  
1029 M. R., BOULOS, S., DISSON, O., THOUVENOT, P., KILCHER, S., WOLLSCHIED,  
1030 B., CABANES, D., LECUIT, M., GRÜNDLING, A. & LOESSNER, M. J. 2019. Phage  
1031 resistance at the cost of virulence: *Listeria monocytogenes* serovar 4b requires  
1032 galactosylated teichoic acids for InlB-mediated invasion. *PLoS Pathog*, 15, e1008032.
- 1033 THOMAS, N. E., WU, C., MORRISON, E. A., ROBINSON, A. E., WERNER, J. P. &  
1034 HENZLER-WILDMAN, K. A. 2018. The C terminus of the bacterial multidrug  
1035 transporter EmrE couples drug binding to proton release. *J Biol Chem*, 293, 19137-  
1036 19147.
- 1037 UBARETXENA-BELANDIA, I., BALDWIN, J. M., SCHULDINER, S. & TATE, C. G.  
1038 2003. Three-dimensional structure of the bacterial multidrug transporter EmrE shows  
1039 it is an asymmetric homodimer. *EMBO J*, 22, 6175-81.
- 1040 UCHIKAWA, K.-I., SEKIKAWA, I. & AZUMA, I. 1986. Structural Studies on Teichoic  
1041 Acids in Cell Walls of Several Serotypes of *Listeria monocytogenes*. *The Journal of*  
1042 *Biochemistry*, 99, 315-327.
- 1043 WATERHOUSE, A. M., PROCTER, J. B., MARTIN, D. M., CLAMP, M. & BARTON, G. J.  
1044 2009. Jalview Version 2--a multiple sequence alignment editor and analysis  
1045 workbench. *Bioinformatics*, 25, 1189-91.
- 1046 WEBB, A. J., KARATSA-DODGSON, M. & GRÜNDLING, A. 2009. Two-enzyme systems  
1047 for glycolipid and polyglycerolphosphate lipoteichoic acid synthesis in *Listeria*  
1048 *monocytogenes*. *Mol Microbiol*, 74, 299-314.
- 1049 WEIDENMAIER, C. & PESCHEL, A. 2008. Teichoic acids and related cell-wall  
1050 glycopolymers in Gram-positive physiology and host interactions. *Nat Rev Microbiol*,  
1051 6, 276-87.
- 1052 WEISSBORN, A. C., RUMLEY, M. K. & KENNEDY, E. P. 1991. Biosynthesis of membrane-  
1053 derived oligosaccharides. Membrane-bound glucosyltransferase system from  
1054 *Escherichia coli* requires polyprenyl phosphate. *J Biol Chem*, 266, 8062-7.
- 1055 WÖRMANN, M. E., CORRIGAN, R. M., SIMPSON, P. J., MATTHEWS, S. J. &  
1056 GRÜNDLING, A. 2011. Enzymatic activities and functional interdependencies of  
1057 *Bacillus subtilis* lipoteichoic acid synthesis enzymes. *Mol Microbiol*, 79, 566-83.
- 1058 XAYARATH, B. & YOTHER, J. 2007. Mutations blocking side chain assembly,  
1059 polymerization, or transport of a Wzy-dependent *Streptococcus pneumoniae* capsule  
1060 are lethal in the absence of suppressor mutations and can affect polymer transfer to the  
1061 cell wall. *J Bacteriol*, 189, 3369-81.
- 1062 XIA, G., MAIER, L., SANCHEZ-CARBALLO, P., LI, M., OTTO, M., HOLST, O. &  
1063 PESCHEL, A. 2010. Glycosylation of wall teichoic acid in *Staphylococcus aureus* by  
1064 TarM. *J Biol Chem*, 285, 13405-15.
- 1065 YAN, A., GUAN, Z. & RAETZ, C. R. 2007. An undecaprenyl phosphate-aminoarabinose  
1066 flippase required for polymyxin resistance in *Escherichia coli*. *J Biol Chem*, 282,  
1067 36077-89.
- 1068 YERUSHALMI, H., LEBENDIKER, M. & SCHULDINER, S. 1995. EmrE, an *Escherichia*  
1069 *coli* 12-kDa multidrug transporter, exchanges toxic cations and H<sup>+</sup> and is soluble in  
1070 organic solvents. *J Biol Chem*, 270, 6856-63.
- 1071 YERUSHALMI, H., LEBENDIKER, M. & SCHULDINER, S. 1996. Negative dominance  
1072 studies demonstrate the oligomeric structure of EmrE, a multidrug antiporter from  
1073 *Escherichia coli*. *J Biol Chem*, 271, 31044-8.
- 1074 YERUSHALMI, H. & SCHULDINER, S. 2000. A common binding site for substrates and  
1075 protons in EmrE, an ion-coupled multidrug transporter. *FEBS Lett*, 476, 93-7.

- 1076 YOKOYAMA, K., ARAKI, Y. & ITO, E. 1988. The function of galactosyl  
1077 phosphorylpolyprenol in biosynthesis of lipoteichoic acid in *Bacillus coagulans*. *Eur J*  
1078 *Biochem*, 173, 453-8.
- 1079 ZHENG, S., SHAM, L. T., RUBINO, F. A., BROCK, K. P., ROBINS, W. P., MEKALANOS,  
1080 J. J., MARKS, D. S., BERNHARDT, T. G. & KRUSE, A. C. 2018. Structure and  
1081 mutagenic analysis of the lipid II flippase MurJ from *Escherichia coli*. *Proc Natl Acad*  
1082 *Sci U S A*, 115, 6709-6714.  
1083
